*Entamoeba histolytica* develops resistance to complement deposition and lysis after acquisition of human complement regulatory proteins through trogocytosis

Hannah W. Miller<sup>1</sup>, Tammie S.Y. Tam<sup>1</sup> and Katherine S. Ralston<sup>1\*</sup>

<sup>1</sup>Department of Microbiology and Molecular Genetics, University of California, Davis, USA

\*Address correspondence to Katherine S. Ralston, [ksralston@ucdavis.edu](mailto:ksralston@ucdavis.edu)

Running Title: Evasion of complement lysis by *Entamoeba histolytica*

1 **ABSTRACT**

2 *Entamoeba histolytica* is the cause of amoebiasis. The trophozoite (amoeba) form of this parasite is  
3 capable of invading the intestine, and can disseminate through the bloodstream to other organs. The  
4 mechanisms that allow amoebae to evade complement deposition during dissemination have not been well  
5 characterized. We previously discovered a novel complement-evasion mechanism employed by *E. histolytica*.  
6 *E. histolytica* ingests small bites of living human cells in a process termed trogocytosis. We demonstrated that  
7 amoebae were protected from lysis by human serum following trogocytosis of human cells, and that amoebae  
8 acquired and displayed human membrane proteins from the cells they ingested. Here, we aimed to define  
9 how amoebae are protected from complement lysis after performing trogocytosis. We found that amoebae  
L0 were protected from complement lysis after ingestion of both human Jurkat T cells and red blood cells, and  
L1 that the level of protection correlated with the amount of material ingested. Trogocytosis of human cells led  
L2 to a reduction in deposition of C3b on the surface of amoebae. We asked whether display of human  
L3 complement regulators is involved in amoebic protection, and found that CD59 was displayed by amoebae  
L4 after trogocytosis. Deletion of a single complement regulatory protein, CD59 or CD46, from Jurkat cells was  
L5 not sufficient to alter amoebic protection. Removal of all GPI-anchored proteins, including CD59 and CD55,  
L6 from the surface of amoebae that had undergone trogocytosis suggested that multiple, redundant  
L7 complement regulators mediate amoebic protection. These studies shed light on a novel strategy for immune  
L8 evasion by a pathogen.

## 19 **IMPORTANCE**

20 *Entamoeba histolytica* is the cause of amoebiasis, a diarrheal disease of global importance. While  
21 infection is often asymptomatic, the trophozoite (amoeba) form of this parasite is capable of invading and  
22 ulcerating the intestine, and can disseminate through the bloodstream to other organs. Understanding how *E.*  
23 *histolytica* evades the complement system during dissemination is of great interest. Here we demonstrate for  
24 the first time that amoebae that have performed trogocytosis (nibbling of human cells) resist deposition of the  
25 complement protein C3b. Amoebae that have performed trogocytosis display the complement regulatory  
26 protein CD59. Overall, our studies suggest that acquisition and display of multiple, redundant complement  
27 regulators is involved in amoebic protection from complement lysis. These findings shed light on a novel  
28 strategy for immune evasion by a pathogen. Since other parasites use trogocytosis for cell killing, our findings  
29 may apply to the pathogenesis of other infections.

## 30 INTRODUCTION

31 Amoebiasis remains a disease of global importance. The 2015 Global Burden of Disease Study  
32 estimated that it was responsible for 67,900 deaths worldwide that year (1). Its causative agent, *Entamoeba*  
33 *histolytica*, is prevalent in countries with poor sanitation and is spread through feces-contaminated food and  
34 water (2). In the rural area of Durango, Mexico, the seroprevalence of *E. histolytica* was found to be as high as  
35 42% (3), and a longitudinal study of children living in an urban community of Dhaka, Bangladesh found that  
36 80% were infected with the parasite by two years of age (4).

37 While infection with *E. histolytica* is often asymptomatic, it can result in diarrheal disease, colitis and  
38 extraintestinal abscesses (5). Following ingestion of the cyst form of the parasite, excystation occurs and the  
39 trophozoite stage (amoeba) colonizes the large intestine (6). Amoebae are capable of invading and ulcerating  
40 the intestine, causing tissue damage and bloody diarrhea. They can also disseminate through the bloodstream  
41 to other organs, most commonly the liver, where they form abscesses that are fatal if left untreated (5). The  
42 mechanisms that allow amoebae to evade complement deposition during dissemination have not been well  
43 characterized. Pathogenic strains of *E. histolytica* isolated from patients have been shown to be more resistant  
44 to complement lysis than nonpathogenic strains (7). It has also been found that the pathogenic amoeba  
45 species *E. histolytica* appears to be more resistant to complement than its nonpathogenic relative *E. dispar* (8).  
46 *E. histolytica* cysteine proteases can cleave complement components (9–11), and the Gal/GalNAc lectin has  
47 been described as a CD59 mimicry molecule (12). However, these mechanisms alone are not sufficient to fully  
48 protect amoebae from complement lysis, as trophozoites are readily lysed by human serum *in vitro* (13).

49 We previously discovered a novel complement-evasion mechanism employed by *E. histolytica* (13).  
50 Trogocytosis, or “cell nibbling,” is present in many eukaryotes and occurs in a variety of contexts (14). In *E.*  
51 *histolytica*, trogocytosis is a process in which amoebae ingest small bites of living human cells (15). Our  
52 previous work has defined amoebic trogocytosis as both a mechanism for cell killing (15), and more recently,  
53 for immune evasion (13). We demonstrated that amoebae were protected from lysis by human serum



54 following trogocytosis of human cells (13), and that amoebae acquired and displayed human membrane  
55 proteins from the cells they ingested (13). This work suggested a model in which amoebae incorporate  
56 proteins from human cells they eat on their surface, and these proteins in turn inhibit complement lysis.

57 In the present study, we aimed to define the mechanism by which amoebae are protected from  
58 complement lysis after performing trogocytosis. We found that trogocytosis of human cells reduced  
59 deposition of the complement protein C3b the surface of amoebae, and that amoebae were protected from  
60 complement lysis after ingestion of both human Jurkat T cells and primary red blood cells. We identified the  
61 human complement regulatory protein CD59 (protectin) as one of the proteins that is taken from ingested  
62 human cells and displayed on the amoebic surface. Deletion of a single complement regulatory protein, CD59  
63 or CD46, from human Jurkat cells was not sufficient to alter conferred protection on amoebae. Overall, these  
64 studies suggest that multiple, redundant complement regulators are involved in amoebic protection.

## 55 RESULTS

### 56 Amoebic protection from complement following trogocytosis is dose-dependent.

57 To determine if the amount of trogocytosed human cell material influenced protection, or if any level  
58 of trogocytosis was protective, we allowed amoebae to ingest incrementally larger amounts. Amoebae  
59 became increasingly protected from complement lysis (**Fig. 1b-c, S3a**) after ingesting higher quantities of live  
60 Jurkat cell material (**Fig. 1a, 1g**). Thus, acquired protection from complement lysis correlates with the amount  
61 of human cell material ingested through trogocytosis.

62 We next asked if protection could be conferred through trogocytosis of primary human cells. During  
63 invasive infections, amoebae breach the intestinal wall and disseminate via the bloodstream. Detection of  
64 amoebae containing ingested red blood cells in the stool has previously been used as a diagnostic for invasive  
65 disease (16). Therefore, we asked if ingestion of human red blood cells would lead to protection. Amoebae  
66 were allowed to ingest increasing numbers of human red blood cells. Increased trogocytosis of red blood cells  
67 led to increased protection from complement lysis (**Fig. 1d-f, 1h, S3b**). These results support a model where  
68 the level of protection from complement lysis is proportional to the amount of human cell material that was  
69 ingested during trogocytosis.

### 30 Amoebic trogocytosis of human cells inhibits deposition of complement C3b.

31 It can be inferred that lysis of amoebae by human serum is due to complement activity because heat-  
32 inactivated serum does not lyse amoebae (13). Here, we formally tested if trogocytosis of human cells led to  
33 reduced deposition of complement on the amoebae surface. Amoebae that had been co-incubated with live  
34 human cells had less death and less deposited human C3b on their surface than amoebae that were incubated  
35 alone (**Fig. 2 a-b, S4**). Furthermore, live amoebae had less deposited C3b than dead amoebae (**Fig. 2c, 2e**).  
36 Among amoebae had been co-incubated with human cells, both live and dead amoebae had less deposited  
37 C3b, compared to amoebae that were incubated alone (**Fig. 2d**). Therefore, trogocytosis of human cells  
38 prevents complement lysis of amoebae and inhibits deposition of complement C3b.

39 **Amoebae acquire the complement regulatory protein CD59 from human cells.**

40 We hypothesized that protection from complement lysis was due to display of human complement  
41 regulatory proteins. We first chose to look at acquisition of the complement regulatory protein CD59  
42 (protectin), a membrane protein that is expressed by both Jurkat cells and human red blood cells (17–19).  
43 CD59 inhibits terminal components of the complement cascade and formation of the membrane attack  
44 complex (17, 20–22). After amoebae had performed trogocytosis, patches of CD59 were detected on the  
45 amoeba surface within five minutes (**Fig. 3a**) and a larger quantity of CD59 patches were detected on the  
46 amoeba surface after one hour of trogocytosis (**Fig. 3a-c**). The patchy/punctate localization pattern is similar  
47 to the localization pattern of other human proteins displayed by amoebae after trogocytosis (13). Since the  
48 heavy chain of the amoeba surface Gal/GalNAc lectin has been implicated as a CD59 mimicry molecule (12,  
49 23), we asked if the CD59 antibody used in these assays cross-reacted with the Gal/GalNAc lectin. Importantly,  
50 we did not see CD59 labeling on control amoebae that had not performed trogocytosis (**Fig. 3a**), showing that  
51 the CD59 antibody did not cross-react with the Gal/GalNAc lectin.

52 Imaging flow cytometry analysis was used to quantify amoebic acquisition of CD59. Human cell nuclei  
53 are not ingested during trogocytosis (15). Therefore, labeling of human cell nuclei was used to differentiate  
54 intact, extracellular human cells from patches of human proteins displayed on amoebae. Patches of displayed  
55 human CD59 were detected on amoebae that had performed trogocytosis, but not on amoebae that were  
56 incubated alone (**Fig. 4a-c, S5**). Amoebae had ~38% more displayed CD59 after one hour of trogocytosis than  
57 after five minutes (**Fig. 4b**). These findings indicate that amoebae acquired and displayed CD59 within five  
58 minutes of trogocytosis, and the quantity of displayed CD59 increased over time.

59 **Removal of GPI-anchored surface proteins trends towards restoring complement lysis of amoebae.**

60 We next sought to test the effect of removing complement regulatory proteins on conferred  
61 protection. CD59 is a glycosylphosphatidylinositol (GPI) anchored protein that can be cleaved with the enzyme  
62 phosphatidylinositol-specific phospholipase C (PI-PLC) (17, 18, 20, 22). In addition to removing CD59,

13 treatment with PI-PLC also cleaves the GPI-anchored complement regulatory protein CD55 (Decay-  
14 accelerating factor) (24, 25). CD55 is expressed by both Jurkat cells and human red blood cells (19, 26) and  
15 accelerates the decay of C3 and C5 convertases of the classical and alternative complement pathways (26, 27).  
16 Amoebae were allowed to perform trophocytosis or incubated alone, and then treated with PI-PLC before  
17 exposure to human serum. Heat-inactivated PI-PLC was used as a control. PI-PLC treatment appeared to  
18 reduce amoebic protection from complement lysis (**Fig. S1a, S6**). However, this difference was not statistically  
19 significant. This is likely to be due to the higher levels of variability in this assay, which were due to the  
20 prolonged incubation of amoebae on ice during PI-PLC treatment. Indeed, due to the incubation on ice, the  
21 background level of cell death of untreated amoebae was much higher than typical. These findings suggested  
22 that removal of all GPI-anchored proteins reduces amoebic protection from complement lysis, but did not  
23 prove a causal relationship.

#### 24 **Removal of CD59 and CD46 is not sufficient to sensitize amoebae to complement lysis.**

25 Due to the higher levels of variability that we observed with PI-PLC treatment, we next used human cell  
26 mutants to test whether individual proteins were required for protection from complement lysis. We tested  
27 the requirements for CD59 and CD46. CD46 (Membrane cofactor protein) is expressed by human Jurkat cells  
28 (28) and acts as a co-factor for serum factor I, which cleaves and inactivates complement components C3b and  
29 C4b (29–31). In order to determine if acquisition and display of human CD59 or CD46 molecules was required  
30 for protection from complement, we used CRISPR/Cas9 to create human cell knockout mutants that lacked  
31 these proteins. Sanger sequencing (**Fig. S2**) and antibody staining of CD59 (**Fig. 5a-b**) and CD46 (**Fig. 5c-d**)  
32 showed that knockout mutants were successfully generated. Amoebae that were allowed to perform  
33 trophocytosis on control human cells or cells that lacked either CD59 or CD46 were equally protected from  
34 complement lysis (**Fig. 5e, S6**). Additionally, there was no difference in the amount of ingested human cell  
35 material (**Fig. 5f**). These findings reveal that removal of either CD59 or CD46 individually is not sufficient to  
36 sensitize amoebae to complement lysis. Furthermore, they hint at redundancy in the mechanism of protection

37 and that amoebae likely acquire and display multiple complement regulatory proteins from the cells they  
38 ingest.

## DISCUSSION

Our findings reveal that amoebae are protected from complement lysis through trogocytosis of human cells and that ingestion of human cells leads to less deposited C3b on the amoeba surface. Amoebae acquire protection from both human Jurkat cells as well as primary red blood cells and conferred protection is proportional to the amount of ingested human cell material. Trogocytosis of human cells results in the display of the complement regulatory protein CD59 on the amoebae surface. Finally, although removal of the individual complement regulatory proteins CD59 and CD46 did not influence acquired protection, removal of all GPI anchored proteins, including CD59 and CD55, was associated with a non-significant loss in acquired protection.

Many studies have shown that cancer cells overexpress complement regulatory molecules, allowing them to evade complement lysis. However, it should be noted that expression levels vary widely between cell types and between individual studies (32). Removal of GPI-anchored proteins, which include the complement regulatory proteins CD59 and CD55 but not CD46, with PI-PLC treatment resulted in enhanced susceptibility of cancer cells to complement lysis (24, 25). This is consistent with our finding that PI-PLC treated amoebae that had undergone trogocytosis of human cells, and been made resistant to complement, became more sensitive to complement lysis. Treatment with PI-PLC removes other GPI-anchored proteins in addition to CD59 and CD55, so we cannot rule out the possibility that loss of other membrane proteins contributed to the loss of complement resistance in our PI-PLC treated amoebae.

There have been several studies that examined the efficacy of using blocking antibodies against complement regulatory proteins to enhance lysis of cancer cells. Results from blocking individual proteins have been highly variable in different cell types but blocking one or more proteins was effective in many cases. Using antibodies against CD46 was rarely effective, however antibodies against CD59 and CD55 often were effective in enhancing complement lysis (32). Additionally, there appears to be an additive effect when multiple proteins are targeted at once. Cervical carcinoma cells were rendered more susceptible to

53 complement after treatment with blocking antibodies to CD59 and CD55, and lysis was increased further when  
54 cells were treated with both antibodies (33). Similarly, breast carcinoma cells, were more easily lysed after  
55 treatment with anti-CD59 and anti-CD55 antibodies, but a much higher degree of lysis was achieved when a  
56 mixture of anti-CD59, anti-CD55, and anti-CD46 antibodies was used (34). Since neither removal of CD46 or  
57 CD59 was sufficient to sensitize amoebae to complement lysis, it is possible that amoebic display of multiple  
58 different complement regulators enables protection from lysis. While removal of CD46 or CD59 did not  
59 sensitize amoebae to complement lysis, these proteins could still contribute to amoebic complement  
70 protection, as part of a collection of multiple redundant, complement regulators that protect amoebae from  
71 lysis. Since we found that amoebae that have performed trophocytosis are resistant to C3b deposition, it is  
72 possible that multiple complement regulators that act earlier in the complement cascade, upstream of C3b  
73 deposition, are needed for protection from complement lysis.

74 Our results support a model whereby amoebae are protected from serum lysis in the blood through  
75 trophocytosis of red blood cells they encounter there, and potentially from other cells they encounter before  
76 reaching the bloodstream. Amoebae likely acquire and display multiple complement regulatory proteins from  
77 the human cells that they ingest, which then leads to less C3b deposition, and protection from complement  
78 lysis.

## 79 MATERIALS AND METHODS

### 30 Cell culture

31 *E. histolytica* trophozoites (HM1:IMSS) from ATCC (amoebae) were cultured as described previously  
32 (13). Amoebae were maintained in glass tissue culture tubes at 35°C in TYI-S-33 medium supplemented with  
33 15% heat-inactivated adult bovine serum (Gemini Bio-Products), 2.3% Diamond vitamin Tween 80 solution  
34 (40x; Sigma-Aldrich), and 80 U/ml penicillin, 80 µg/ml streptomycin (Gibco). Amoebae were expanded in T25  
35 un-vented tissue culture flasks and harvested when flasks reached 80% confluence. When used in serum lysis  
36 or immunofluorescence assays, amoebae were resuspended in M199s medium (Gibco medium M199 with  
37 Earle's salts, L-glutamine, and 2.2 g/liter sodium bicarbonate, without phenol red) supplemented with 0.5%  
38 bovine serum albumin (BSA), 25 mM HEPES, and 5.7 mM L-cysteine.

39 Human Jurkat T cells (clone E6-1) from ATCC were grown in vented T25 tissue culture flasks at 37°C and  
40 5% CO<sub>2</sub> as previously described (13). Jurkat cells were cultured in RPMI 1640 medium (Gibco; RPMI 1640 with  
41 L-glutamine and without phenol red) supplemented with 10% heat-inactivated fetal bovine serum (Gibco), 100  
42 U/ml penicillin, 100 µg/ml streptomycin, and 10 mM HEPES. Jurkat cells were expanded in T75 vented tissue  
43 culture flasks and harvested when cell density reached between  $5 \times 10^5$  and  $2 \times 10^6$  cells/ml. Jurkat cells were  
44 resuspended in M199s medium for use in serum lysis or immunofluorescence assays.

45 Single donor human red blood cells separated from whole blood by centrifugation and negative for the  
46 presence of human immunodeficiency virus-1 (HIV-1), HIV-2, HIV-1 antigen or HIV-1 nucleic acid test, hepatitis  
47 B surface antigen, hepatitis C virus, syphilis, and alanine aminotransferase test were purchased from  
48 Innovative Research (Cat# IWB3CPDA1UNIT). Red blood cells were stored at 4°C and resuspended in M199s  
49 medium prior to use in serum lysis assays.

### 50 DNA constructs

51 Guide RNAs (gRNA) to human CD59 or CD46 were cloned into a pX330-U6-Chimeric\_BB-CBh-hSpCas9  
52 plasmid backbone (pX330-U6-Chimeric\_BB-CBh-hSpCas9 was a gift from Feng Zhang (Addgene plasmid #



42230; <http://n2t.net/addgene:42230> ; RRID:Addgene\_42230) (35)). Guide RNAs were created by using the sequences designed by Thielen et. al, 2018 (36). The gRNA oligos used are presented in **Table 1** with BbsI restriction enzyme overhangs shown in bold. Guide RNAs were cloned into the pX330-U6-Chimeric\_BB-CBh-hSpCas9 plasmid backbone using a modified version of the Zhang Lab General Cloning Protocol (Addgene <http://www.addgene.org/crispr/zhang/>). Briefly, the px330 plasmid backbone was digested with BbsI restriction enzyme (FastDigest Bpil: ThermoFisher Scientific). Guide RNA oligos containing BbsI overhangs were then phosphorylated and annealed. Next, annealed oligos were ligated into the pX330 plasmid backbone and NEB 5-alpha Competent *E. coli* were transformed (New England Biolabs). Positive colonies were screened by restriction digest. Plasmids with the correct inserts were confirmed by Sanger sequencing using the “U6” Universal Primer from GENEWIZ (LKO.1 5’) which is located in the human U6 promoter (**Table 1**).

### **Jurkat T cell CRISPR/Cas9 mutants**

Human Jurkat T cells were transfected with pX330 plasmids containing the CD59 gRNA, the CD46 gRNA, or the pX330 backbone as a control. Plasmid DNA was isolated in an endotoxin-free manner (GenElute™ HP Endotoxin-Free Plasmid Maxiprep Kit; Sigma-Aldrich) and concentrated using paramagnetic beads (HighPrep PCR Clean Up System; Magbio). Jurkat T cells were transfected using the Neon Transfection System (Invitrogen) with the 10 µl tip and 24 well plate format. Cells were prepared, and the Neon Transfection System was used according to the manufacturer’s instructions. The transfection conditions used were as follows: volts = 1050, width = 30 and pulse # = 2.

When creating the CD59 and CD46 knockout mutants, 1.8 µg of plasmid DNA was used with  $1 \times 10^5$  cells per transfection reaction and two reactions were performed for each plasmid and transferred to 1 well of a 24 well plate. Transfection efficiency was calculated by separately transfecting an enhanced green fluorescent protein (EGFP) expression plasmid pcDNA3-EGFP (pcDNA3-EGFP was a gift from Doug Golenbock (Addgene plasmid # 13031 ; <http://n2t.net/addgene:13031> ; RRID:Addgene\_13031)) in parallel. Percentage of EGFP expressing cells was calculated after 24 hours by fixing samples with 4% paraformaldehyde (Electron

27 Microscopy Sciences) and analyzing with imaging flow cytometry. To generate CD59 expressing Jurkat cells, 2  
28  $\mu\text{g}$  of plasmid DNA was used with  $2 \times 10^5$  cells per transfection reaction and two reactions were performed for  
29 each plasmid and transferred to 1 well of a 24 well plate.

30 Clonal lines of Jurkat cell mutants were obtained by limiting dilution in 96 well plates. Clonal lines were  
31 screened for knockout by labeling with primary mouse monoclonal antibodies to CD59 (clone MEM-43/5;  
32 Abcam) or CD46 (clone C-10; Santa Cruz Biotechnology) and a Cy<sup>TM</sup>5 AffiniPure Goat Anti-Mouse secondary  
33 antibody (Jackson ImmunoResearch Laboratories, Inc). Samples were analyzed by imaging flow cytometry.  
34 Knockout was confirmed in positive clones by isolating genomic DNA using the Quick-DNA Miniprep kit (Zymo  
35 Research) and polymerase chain reaction (PCR) amplifying regions of either CD59 or CD46. Primer sets had  
36 been identified in BLAST as specific to these genes (**Table 1**). Next, purified PCR product was sequenced with  
37 primers upstream of the predicted CRISPR/Cas9 cut site (**Table 1**) and knockout was confirmed.

#### 38 **Detection of CD59 displayed by amoebae using imaging flow cytometry**

39 Jurkat cells were with labeled Hoechst 33342 dye (Invitrogen) at  $5 \mu\text{g}/\text{ml}$  for 30 minutes at  $37^\circ\text{C}$ .  
40 Amoebae were washed and resuspended in M199s medium and labeled with CellTracker green 5-  
41 chloromethylfluorescein diacetate (CMFDA; Invitrogen) at  $186 \text{ ng}/\text{ml}$  for 10 minutes at  $35^\circ\text{C}$ . Amoebae and  
42 Jurkat cells were then washed and resuspended in M199s medium. Amoebae were resuspended at  $4 \times 10^5$   
43 cells/ml and Jurkat cells were resuspended at  $1.6 \times 10^7$  cells/ ml for a 1:40 amoeba: Jurkat cell ratio. Amoebae  
44 and Jurkat cells were coincubated for either 5 minutes or 1 hour, or amoebae were incubated alone. Cells  
45 were fixed with 4% PFA for 30 minutes at room temperature. Samples were blocked in 1 x PBS containing 0.1%  
46 Tween20 (Sigma-Aldrich) (1 x PBST), 5% BSA and 20% Normal Goat Serum (Jackson ImmunoResearch  
47 Laboratories, Inc) for 1 hour at room temperature on a rocker. Next, samples were labeled with primary  
48 mouse monoclonal antibodies to either CD59 (clone MEM-43/5; Abcam) diluted 1:50 in blocking solution at  
49  $4^\circ\text{C}$  overnight on a rocker. Samples were washed with 1 x PBST and labeled with a Cy5 AffiniPure Goat Anti-  
50 Mouse secondary antibody (Jackson ImmunoResearch Laboratories, Inc) stored in 50% glycerol (Sigma-

51 Aldrich). The secondary antibody was diluted 1:100 in blocking solution, for a final dilution of 1:200, and  
52 incubated for 3 hours at room temperature on a rocker. Lastly, samples were washed with 1 x PBST,  
53 resuspended in 50  $\mu$ l 1 x PBS, and run on an Amnis ImageStreamX Mark II. 10,000 events were collected for  
54 conditions where amoebae were incubated alone and 100,000 events were collected for conditions where  
55 amoebae were incubated with Jurkat cells. Data are from 5 replicates across 3 independent experiments. The  
56 no primary control condition was performed in 2 of 3 independent experiments and data are from 3  
57 replicates. See Figure S5 for the analysis gating scheme.

### 58 **Detection of CD59 displayed by amoebae using confocal microscopy**

59 Cells were labeled for confocal microscopy as described previously (13). Amoebae were prepared in  
60 the same manner as the for the detection of CD59 using imaging flow cytometry (above) with an approximate  
61 fourfold increased concentration of CMFDA. After labeling with antibodies, samples were mounted using  
62 Vectashield (Vector Laboratories) on Superfrost Plus microslides (VWR) with glass coverslips. Slides were  
63 imaged on an Intelligent Imaging Innovations hybrid Spinning Disk Confocal-TIRF-Widefield Microscope. 136  
64 Images were collected from 1 independent experiment. FIJI software was used for image analysis (37).

### 65 **Serum lysis assays**

66 For experiments where amoebae were incubated with increasing numbers of Jurkat cells, amoebae  
67 were washed and resuspended in M199s medium and labeled with CMFDA at 186 ng/ml for 10 minutes at  
68 35°C. Jurkat cells were washed and labeled in M199s with DiD at 21  $\mu$ g/ml for 5 minutes at 37°C and 10  
69 minutes at 4°C. Amoebae were washed and resuspended at 4 x 10<sup>5</sup> cells/ml. Jurkat cells were washed a  
70 resuspended at 2 x 10<sup>6</sup> cells/ml, 4 x 10<sup>6</sup> cells/ml, 8 x 10<sup>6</sup> cells/ml and 1.6 x 10<sup>7</sup> cells/ml. Amoebae were  
71 incubated alone or the presence of Jurkat cells at a 1:5, 1:10, 1:20, and 1:40 ratio for 1 hour at 35°C. Next,  
72 samples were resuspended in 100% normal human serum (pooled normal human complement serum;  
73 Innovative Research Inc.) supplemented with 150  $\mu$ M CaCl<sub>2</sub> and 150  $\mu$ M MgCl<sub>2</sub> for 30 minutes at 35°C as  
74 described previously (13). Following exposure to human serum, samples were resuspended in M199s medium

75 and labeled using Zombie Violet Fixable Viability dye (BioLegend), prepared according to the manufacturer's  
76 instructions, at a concentration of 4  $\mu$ l/ml for 30 minutes on ice. Next, samples were fixed with 4% PFA at  
77 room temperature for 30 minutes. Samples were then resuspended in 50  $\mu$ l 1 x PBS, and run on an Amnis  
78 ImageStreamX Mark II. 10,000 events were collected for samples where amoebae were incubated alone or  
79 with Jurkat cells at a 1:5 ratio. 10,00 – 20,000 events were collected for samples with Jurkat cells at a 1:10  
80 ratio, 10,00 - 40,000 events were collected for samples with a 1:20 ratio, and 50,000 - 80,000 events for  
81 samples with a 1:40 ratio. Data are from 6 replicates across 3 independent experiments. See Figure S3 for the  
82 analysis gating scheme.

83 For experiments with CD59 and CD46 knockout mutants, the serum lysis assay used was the same as  
84 described above, except only a 1:40 ratio of amoebae to Jurkat cells was used, instead of multiple different  
85 ratios. Amoebae were incubated alone, in the presences of Jurkat cells transfected with the px330 vector  
86 control, or with either CD59 or CD46 knockout Jurkat cell mutants at a 1:40 ratio. Cells were gated on by size  
87 and 10,000 events from the amoeba alone conditions and 100,000 events of the amoebae incubated with  
88 Jurkat cells conditions were collected. Data are from 6 replicates across 3 independent experiments. See  
89 Figure S6 for the analysis gating scheme.

90 In experiments where samples were treated with phospholipase C , the assay was performed as  
91 described above with the addition of a treatment step preceding exposure to serum. Only a 1:40 ratio of  
92 amoebae to Jurkat cells was used, instead of multiple different ratios. Following coincubation of amoebae and  
93 Jurkat cells, samples were immediately placed on ice and resuspended in ice-cold M199s medium. Samples  
94 were treated with either 500 mU of Phospholipase C (PI-PLC) (Phospholipase C, Phosphatidylinositol-specific  
95 from *Bacillus cereus*; Sigma-Aldrich) prepared according to the manufacturer's instructions, or 500 mU heat-  
96 inactivated PI-PLC. PI-PLC was heat-inactivated at 95°C for 30 minutes. PI-PLC was carried out on ice, on a  
97 rocker, in a 4°C cold room for 30 minutes. Cells were gated on by size and 10,000 events from the amoebae  
98 alone conditions and 100,000 events of the amoebae incubated with Jurkat cells were collected. Data are from

8 replicates across 4 independent experiments. The untreated control condition was performed 3 of 4 independent experiments and data are from 6 replicates. See Figure S6 for the analysis gating scheme.

For experiments where amoebae were incubated with increasing numbers of red blood cells, amoebae were incubated with red blood cells resuspended at  $4 \times 10^6$  cells/ml,  $4 \times 10^7$  cells/ml, and  $4 \times 10^8$  cells/ml for a 1:10, 1:100, and 1:1000 amoebae to red blood cell ratio. The amoeba population was gated on by size and 10,000 amoeba events were collected for samples where amoebae were incubated alone or with red blood cells at a 1:10 ratio, a 1:100 ratio. 100,000 events were collected for amoebae incubated with red blood cells at a 1:1000 ratio. Data are from 6 replicates from 3 independent experiments. See Figure S3 for the analysis gating scheme.

For C3b experiments, amoebae were labeled with CMFDA and Jurkat cells were left unlabeled. Amoebae and Jurkats were incubated together at a 1:40 amoebae: Jurkat ratio. After fixation, samples were blocked in 1 x PBST containing 5% BSA and 20% Normal Goat Serum for 30 minutes at room temperature on a rocker. Samples were then labeled with a mouse monoclonal antibody to complement components C3b and iC3b (Clone E7; MilliporeSigma) diluted 1:100 in blocking solution at 4°C overnight on a rocker. Samples were washed in 1 x PBST and labeled with an Alexa Fluor 47 AffiniPure Fab Fragment Donkey Anti-Mouse secondary antibody (Jackson ImmunoResearch Laboratories, Inc) stored in 50% glycerol (Sigma-Aldrich). The secondary antibody was diluted 1:100 in blocking solution for a final dilution of 1:200, and samples were incubated for 3 hours at room temperature on a rocker. Samples were washed in 1 x PBST, resuspended in 50  $\mu$ l 1 x PBS, and run on an Amnis ImageStreamX Mark II. 10,000 events were collected in samples where amoebae were incubated alone and 100,000 events were collected in samples where amoebae were incubated with Jurkat cells. Data are from 6 replicates across 3 independent experiments. See Figure S4 for the analysis gating scheme.

## Statistical analysis

22 GraphPad Prism software was used to perform all statistical analyses and the means and standard  
23 deviation values are displayed on all data plots. Analyses were done using a Student's unpaired t test (no  
24 significant difference was indicated by a P of >0.05; \*,  $P \leq 0.05$ ; \*\*,  $P \leq 0.01$ ; \*\*\*,  $P \leq 0.001$ ; \*\*\*\*,  $P \leq 0.0001$ ).

## 25 **ACKNOWLEDGMENTS**

26           We thank Dr. Scott Dawson, Dr. Stephen McSorley, and the members of our laboratory for helpful  
27 discussions. All ImageStream and confocal data were acquired using shared instrumentation in the UC Davis  
28 MCB Light Microscopy Imaging Facility. We thank Dr. Michael Paddy for technical support in the use of these  
29 instruments. This work was funded by NIH grant AI146914 and a Pew Scholarship awarded to K.S.R.

30 **AUTHOR CONTRIBUTIONS**

31 H.W.M. designed and performed the experiments. T.S.Y.T. contributed intellectually to the studies and  
32 performed support experiments not included in the final paper. K.S.R. conceived of the overall approach and  
33 oversaw the design and analysis of the experiments. H.W.M. and K.S.R. wrote the manuscript.



## 34 REFERENCES

- 35 1. Wang H, Naghavi M, Allen C, Barber RM, Bhutta ZA, Carter A, Casey DC, Charlson FJ, Chen AZ, Coates MM,  
36 Coggeshall M, Dandona L, Dicker DJ, Erskine HE, Ferrari AJ, Fitzmaurice C, Foreman K, Forouzanfar MH,  
37 Fraser MS, Fullman N, Gething PW, Goldberg EM, Graetz N, Haagsma JA, Hay SI, Huynh C, Johnson CO,  
38 Kassebaum NJ, Kinfu Y, Kulikoff XR, Kutz M, Kyu HH, Larson HJ, Leung J, Liang X, Lim SS, Lind M, Lozano R,  
39 Marquez N, Mensah GA, Mikesell J, Mokdad AH, Mooney MD, Nguyen G, Nsoesie E, Pigott DM, Pinho C,  
40 Roth GA, Salomon JA, Sandar L, Silpakit N, Sligar A, Sorensen RJD, Stanaway J, Steiner C, Teeple S, Thomas  
41 BA, Troeger C, VanderZanden A, Vollset SE, Wanga V, Whiteford HA, Wolock T, Zoeckler L, Abate KH,  
42 Abbafati C, Abbas KM, Abd-Allah F, Abera SF, Abreu DMX, Abu-Raddad LJ, Abyu GY, Achoki T, Adelekan AL,  
43 Ademi Z, Adou AK, Adsuar JC, Afanvi KA, Afshin A, Agardh EE, Agarwal A, Agrawal A, Kiadaliri AA, Ajala ON,  
44 Akanda AS, Akinyemi RO, Akinyemiju TF, Akseer N, Lami FHA, Alabed S, Al-Aly Z, Alam K, Alam NKM,  
45 Alasfoor D, Aldhahri SF, Aldridge RW, Alegretti MA, Aleman AV, Alemu ZA, Alexander LT, Alhabib S, Ali R,  
46 Alkerwi A, Alla F, Allebeck P, Al-Raddadi R, Alsharif U, Altirkawi KA, Martin EA, Alvis-Guzman N, Amare AT,  
47 Amegah AK, Ameh EA, Amini H, Ammar W, Amrock SM, Andersen HH, Anderson BO, Anderson GM,  
48 Antonio CAT, Aregay AF, Ärnlöv J, Arsenijevic VSA, Artaman A, Asayesh H, Asghar RJ, Atique S, Avokpaho  
49 EFGA, Awasthi A, Azzopardi P, Bacha U, Badawi A, Bahit MC, Balakrishnan K, Banerjee A, Barac A, Barker-  
50 Collo SL, Bärnighausen T, Barregard L, Barrero LH, Basu A, Basu S, Bayou YT, Bazargan-Hejazi S, Beardsley J,  
51 Bedi N, Beghi E, Belay HA, Bell B, Bell ML, Bello AK, Bennett DA, Bensenor IM, Berhane A, Bernabé E, Betsu  
52 BD, Beyene AS, Bhala N, Bhalla A, Biadgilign S, Bikbov B, Abdulhak AAB, Biroscak BJ, Biryukov S, Bjertness  
53 E, Blore JD, Blosser CD, Bohensky MA, Borschmann R, Bose D, Bourne RRA, Brainin M, Brayne CEG,  
54 Brazinova A, Breitborde NJK, Brenner H, Brewer JD, Brown A, Brown J, Brugha TS, Buckle GC, Butt ZA,  
55 Calabria B, Campos-Nonato IR, Campuzano JC, Carapetis JR, Cárdenas R, Carpenter DO, Carrero JJ,  
56 Castañeda-Orjuela CA, Rivas JC, Catalá-López F, Cavalleri F, Cercy K, Cerda J, Chen W, Chew A, Chiang PP-C,  
57 Chibalabala M, Chibueze CE, Chimed-Ochir O, Chisumpa VH, Choi J-YJ, Chowdhury R, Christensen H,

58 Christopher DJ, Ciobanu LG, Cirillo M, Cohen AJ, Colistro V, Colomar M, Colquhoun SM, Cooper C, Cooper  
59 LT, Cortinovis M, Cowie BC, Crump JA, Damsere-Derry J, Danawi H, Dandona R, Daoud F, Darby SC, Dargan  
60 PI, das Neves J, Davey G, Davis AC, Davitoliu DV, de Castro EF, de Jager P, Leo DD, Degenhardt L, Dellavalle  
61 RP, Deribe K, Deribew A, Dharmaratne SD, Dhillon PK, Diaz-Torné C, Ding EL, dos Santos KPB, Dossou E,  
62 Driscoll TR, Duan L, Dubey M, Duncan BB, Ellenbogen RG, Ellingsen CL, Elyazar I, Endries AY, Ermakov SP,  
63 Eshrati B, Esteghamati A, Estep K, Faghmous IDA, Fahimi S, Faraon EJA, Farid TA, Farinha CS e S, Faro A,  
64 Farvid MS, Farzadfar F, Feigin VL, Fereshtehnejad S-M, Fernandes JG, Fernandes JC, Fischer F, Fitchett JRA,  
65 Flaxman A, Foigt N, Fowkes FGR, Franca EB, Franklin RC, Friedman J, Frostad J, Fürst T, Futran ND, Gall SL,  
66 Gambashidze K, Gamkrelidze A, Ganguly P, Gankpé FG, Gebre T, Gebrehiwot TT, Gebremedhin AT, Gebru  
67 AA, Geleijnse JM, Gessner BD, Ghoshal AG, Gibney KB, Gillum RF, Gilmour S, Giref AZ, Giroud M, Gishu MD,  
68 Giussani G, Glaser E, Godwin WW, Gomez-Dantes H, Gona P, Goodridge A, Gopalani SV, Gosselin RA,  
69 Gotay CC, Goto A, Gouda HN, Greaves F, Gughani HC, Gupta R, Gupta R, Gupta V, Gutiérrez RA, Hafezi-  
70 Nejad N, Haile D, Hailu AD, Hailu GB, Halasa YA, Hamadeh RR, Hamidi S, Hancock J, Handal AJ, Hankey GJ,  
71 Hao Y, Harb HL, Harikrishnan S, Haro JM, Havmoeller R, Heckbert SR, Heredia-Pi IB, Heydarpour P,  
72 Hilderink HBM, Hoek HW, Hogg RS, Horino M, Horita N, Hosgood HD, Hotez PJ, Hoy DG, Hsairi M, Htet AS,  
73 Htike MMT, Hu G, Huang C, Huang H, Huiart L, Hussein A, Huybrechts I, Huynh G, Iburg KM, Innos K, Inoue  
74 M, Iyer VJ, Jacobs TA, Jacobsen KH, Jahanmehr N, Jakovljevic MB, James P, Javanbakht M, Jayaraman SP,  
75 Jayatilleke AU, Jeemon P, Jensen PN, Jha V, Jiang G, Jiang Y, Jibat T, Jimenez-Corona A, Jonas JB, Joshi TK,  
76 Kabir Z, Kamal R, Kan H, Kant S, Karch A, Karema CK, Karimkhani C, Karletsos D, Karthikeyan G, Kasaeian A,  
77 Katibeh M, Kaul A, Kawakami N, Kayibanda JF, Keiyoro PN, Kemmer L, Kemp AH, Kengne AP, Keren A,  
78 Kereselidze M, Kesavachandran CN, Khader YS, Khalil IA, Khan AR, Khan EA, Khang Y-H, Khera S, Khoja  
79 TAM, Kieling C, Kim D, Kim YJ, Kissela BM, Kissoon N, Knibbs LD, Knudsen AK, Kokubo Y, Kolte D, Kopec JA,  
80 Kosen S, Koul PA, Koyanagi A, Krog NH, Defo BK, Bicer BK, Kudom AA, Kuipers EJ, Kulkarni VS, Kumar GA,  
81 Kwan GF, Lal A, Lal DK, Lalloo R, Lallukka T, Lam H, Lam JO, Langan SM, Lansingh VC, Larsson A, Laryea DO,

32 Latif AA, Lawrynowicz AEB, Leigh J, Levi M, Li Y, Lindsay MP, Lipshultz SE, Liu PY, Liu S, Liu Y, Lo L-T,  
33 Logroscino G, Lotufo PA, Lucas RM, Lunevicius R, Lyons RA, Ma S, Machado VMP, Mackay MT, MacLachlan  
34 JH, Razek HMAE, Magdy M, Razek AE, Majdan M, Majeed A, Malekzadeh R, Manamo WAA, Mandisarisa J,  
35 Mangalam S, Mapoma CC, Marcenes W, Margolis DJ, Martin GR, Martinez-Raga J, Marzan MB, Masiye F,  
36 Mason-Jones AJ, Massano J, Matzopoulos R, Mayosi BM, McGarvey ST, McGrath JJ, McKee M, McMahon  
37 BJ, Meaney PA, Mehari A, Mehndiratta MM, Mejia-Rodriguez F, Mekonnen AB, Melaku YA, Memiah P,  
38 Memish ZA, Mendoza W, Meretoja A, Meretoja TJ, Mhimbira FA, Micha R, Milllear A, Miller TR, Mirarefin  
39 M, Misganaw A, Mock CN, Mohammad KA, Mohammadi A, Mohammed S, Mohan V, Mola GLD, Monasta  
40 L, Hernandez JCM, Montero P, Montico M, Montine TJ, Moradi-Lakeh M, Morawska L, Morgan K, Mori R,  
41 Mozaffarian D, Mueller UO, Murthy GVS, Murthy S, Musa KI, Nachega JB, Nagel G, Naidoo KS, Naik N, Naldi  
42 L, Nangia V, Nash D, Nejjari C, Neupane S, Newton CR, Newton JN, Ng M, Ngesoni FN, de Dieu Ngirabega  
43 J, Nguyen QL, Nisar MI, Pete PMN, Nomura M, Norheim OF, Norman PE, Norrving B, Nyakarahuka L, Ogbo  
44 FA, Ohkubo T, Ojelabi FA, Olivares PR, Olusanya BO, Olusanya JO, Opio JN, Oren E, Ortiz A, Osman M, Ota  
45 E, Ozdemir R, Pa M, Pain A, Pandian JD, Pant PR, Papachristou C, Park E-K, Park J-H, Parry CD, Parsaeian M,  
46 Caicedo AJP, Patten SB, Patton GC, Paul VK, Pearce N, Pedro JM, Stokic LP, Pereira DM, Perico N, Pesudovs  
47 K, Petzold M, Phillips MR, Piel FB, Pillay JD, Plass D, Platts-Mills JA, Polinder S, Pope CA, Popova S, Poulton  
48 RG, Pourmalek F, Prabhakaran D, Qorbani M, Quame-Amaglo J, Quistberg DA, Rafay A, Rahimi K, Rahimi-  
49 Movaghar V, Rahman M, Rahman MHU, Rahman SU, Rai RK, Rajavi Z, Rajsic S, Raju M, Rakovac I, Rana SM,  
50 Ranabhat CL, Rangaswamy T, Rao P, Rao SR, Refaat AH, Rehm J, Reitsma MB, Remuzzi G, Resnikoff S,  
51 Ribeiro AL, Ricci S, Blancas MJR, Roberts B, Roca A, Rojas-Rueda D, Ronfani L, Roshandel G, Rothenbacher  
52 D, Roy A, Roy NK, Ruhago GM, Sagar R, Saha S, Sahathevan R, Saleh MM, Sanabria JR, Sanchez-Niño MD,  
53 Sanchez-Riera L, Santos IS, Sarmiento-Suarez R, Sartorius B, Satpathy M, Savic M, Sawhney M, Schaub MP,  
54 Schmidt MI, Schneider IJC, Schöttker B, Schutte AE, Schwebel DC, Seedat S, Sepanlou SG, Servan-Mori EE,  
55 Shackelford KA, Shaddick G, Shaheen A, Shahrzad S, Shaikh MA, Shakh-Nazarova M, Sharma R, She J,

Sheikhabaehi S, Shen J, Shen Z, Shepard DS, Sheth KN, Shetty BP, Shi P, Shibuya K, Shin M-J, Shiri R, Shiue J, Shrime MG, Sigfusdottir ID, Silberberg DH, Silva DAS, Silveira DGA, Silverberg JI, Simard EP, Singh A, Singh GM, Singh JA, Singh OP, Singh PK, Singh V, Soneji S, Søreide K, Soriano JB, Sposato LA, Sreeramareddy CT, Stathopoulou V, Stein DJ, Stein MB, Stranges S, Stroumpoulis K, Sunguya BF, Sur P, Swaminathan S, Sykes BL, Szoeki CEI, Tabarés-Seisdedos R, Tabb KM, Takahashi K, Takala JS, Talongwa RT, Tandon N, Tavakkoli M, Taye B, Taylor HR, Ao BJT, Tedla BA, Tefera WM, Have MT, Terkawi AS, Tesfay FH, Tessema GA, Thomson AJ, Thorne-Lyman AL, Thrift AG, Thurston GD, Tillmann T, Tirschwell DL, Tonelli M, Topor-Madry R, Topouzis F, Towbin JA, Traebert J, Tran BX, Truelsen T, Trujillo U, Tura AK, Tuzcu EM, Uchendu US, Ukwaja KN, Undurraga EA, Uthman OA, Dingenen RV, van Donkelaar A, Vasankari T, Vasconcelos AMN, Venketasubramanian N, Vidavalur R, Vijayakumar L, Villalpando S, Violante FS, Vlassov VV, Wagner JA, Wagner GR, Wallin MT, Wang L, Watkins DA, Weichenthal S, Weiderpass E, Weintraub RG, Werdecker A, Westerman R, White RA, Wijeratne T, Wilkinson JD, Williams HC, Wiysonge CS, Woldeyohannes SM, Wolfe CDA, Won S, Wong JQ, Woolf AD, Xavier D, Xiao Q, Xu G, Yakob B, Yalew AZ, Yan LL, Yano Y, Yaseri M, Ye P, Yebyo HG, Yip P, Yirsaw BD, Yonemoto N, Yonga G, Younis MZ, Yu S, Zaidi Z, Zaki MES, Zannad F, Zavala DE, Zeeb H, Zeleke BM, Zhang H, Zodpey S, Zonies D, Zuhlke LJ, Vos T, Lopez AD, Murray CJL. 2016. Global, regional, and national life expectancy, all-cause mortality, and cause-specific mortality for 249 causes of death, 1980–2015: a systematic analysis for the Global Burden of Disease Study 2015. *The Lancet* 388:1459–1544.

2. Marie C, Petri WA. 2013. Amoebic dysentery. *BMJ Clin Evid* 2013:0918.

3. Alvarado-Esquivel C, Hernandez-Tinoco J, Sanchez-Anguiano LF. 2015. Seroepidemiology of *Entamoeba histolytica* Infection in General Population in Rural Durango, Mexico. *J Clin Med Res* 7:435–439.

- 27 4. Gilchrist CA, Petri SE, Schneider BN, Reichman DJ, Jiang N, Begum S, Watanabe K, Jansen CS, Elliott KP,  
28 Burgess SL, Ma JZ, Alam M, Kabir M, Haque R, Petri WA. 2016. Role of the Gut Microbiota of Children in  
29 Diarrhea Due to the Protozoan Parasite *Entamoeba histolytica*. *J Infect Dis* 213:1579–1585.
- 30 5. Haque R, Huston CD, Hughes M, Houpt E, Petri WA. 2003. Amebiasis. *New England Journal of Medicine*  
31 348:1565–1573.
- 32 6. Petri WA, Haque R, Mann BJ. 2002. The Bittersweet Interface of Parasite and Host: Lectin-Carbohydrate  
33 Interactions During Human Invasion by the Parasite *Entamoeba histolytica*. *Annu Rev Microbiol* 56:39–64.
- 34 7. Reed SL, Curd JG, Gigli I, Gillin FD, Braude AI. 1986. Activation of complement by pathogenic and  
35 nonpathogenic *Entamoeba histolytica*. *J Immunol* 136:2265–2270.
- 36 8. Costa CA, Nunes AC, Ferreira AJ, Gomes MA, Caliri MV. 2010. *Entamoeba histolytica* and *E. dispar*  
37 trophozoites in the liver of hamsters: in vivo binding of antibodies and complement. *Parasites & Vectors*  
38 3:23.
- 39 9. Reed SL, Ember JA, Herdman DS, DiScipio RG, Hugli TE, Gigli I. 1995. The extracellular neutral cysteine  
40 proteinase of *Entamoeba histolytica* degrades anaphylatoxins C3a and C5a. *J Immunol* 155:266–274.
- 41 10. Reed SL, Gigli I. 1990. Lysis of complement-sensitive *Entamoeba histolytica* by activated terminal  
42 complement components. Initiation of complement activation by an extracellular neutral cysteine  
43 proteinase. *J Clin Invest* 86:1815–1822.
- 44 11. Reed SL, Keene WE, McKerrow JH, Gigli I. 1989. Cleavage of C3 by a neutral cysteine proteinase of  
45 *Entamoeba histolytica*. *J Immunol* 143:189–195.

- 16 12. Braga LL, Ninomiya H, McCoy JJ, Eacker S, Wiedmer T, Pham C, Wood S, Sims PJ, Petri WA. 1992. Inhibition  
17 of the complement membrane attack complex by the galactose-specific adhesion of *Entamoeba*  
18 *histolytica*. *J Clin Invest* 90:1131–1137.
- 19 13. Miller HW, Suleiman RL, Ralston KS. 2019. Trophocytosis by *Entamoeba histolytica* Mediates Acquisition and  
20 Display of Human Cell Membrane Proteins and Evasion of Lysis by Human Serum. *mBio* 10:e00068-19.
- 21 14. Bettadapur A, Miller HW, Ralston KS. 2020. Biting Off What Can Be Chewed: Trophocytosis in Health,  
22 Infection, and Disease. *Infect Immun* 88:e00930-19.
- 23 15. Ralston KS, Solga MD, Mackey-Lawrence NM, Somlata null, Bhattacharya A, Petri WA. 2014. Trophocytosis  
24 by *Entamoeba histolytica* contributes to cell killing and tissue invasion. *Nature* 508:526–530.
- 25 16. González-Ruiz A, Haque R, Aguirre A, Castañón G, Hall A, Guhl F, Ruiz-Palacios G, Miles MA, Warhurst DC.  
26 1994. Value of microscopy in the diagnosis of dysentery associated with invasive *Entamoeba histolytica*. *J*  
27 *Clin Pathol* 47:236–239.
- 28 17. Davies A, Simmons DL, Hale G, Harrison RA, Tighe H, Lachmann PJ, Waldmann H. 1989. CD59, an LY-6-like  
29 protein expressed in human lymphoid cells, regulates the action of the complement membrane attack  
30 complex on homologous cells. *Journal of Experimental Medicine* 170:637–654.
- 31 18. Štefanová I, Hilgert I, Křištofová H, Brown R, Low MG, Hořejši V. 1989. Characterization of a broadly  
32 expressed human leucocyte surface antigen MEM-43 anchored in membrane through  
33 phosphatidylinositol. *Molecular Immunology* 26:153–161.
- 34 19. Cinek T, Horejsí V. 1992. The nature of large noncovalent complexes containing glycosyl-  
35 phosphatidylinositol-anchored membrane glycoproteins and protein tyrosine kinases. *The Journal of*  
36 *Immunology* 149:2262–2270.

- 57 20. Rollins SA, Sims PJ. 1990. The complement-inhibitory activity of CD59 resides in its capacity to block  
58 incorporation of C9 into membrane C5b-9. *J Immunol* 144:3478–3483.
- 59 21. Meri S, Morgan BP, Davies A, Daniels RH, Olavesen MG, Waldmann H, Lachmann PJ. 1990. Human  
60 protectin (CD59), an 18,000-20,000 MW complement lysis restricting factor, inhibits C5b-8 catalysed  
61 insertion of C9 into lipid bilayers. *Immunology* 71:1–9.
- 62 22. Zhao J, Rollins SA, Maher SE, Bothwell AL, Sims PJ. 1991. Amplified gene expression in CD59-transfected  
63 Chinese hamster ovary cells confers protection against the membrane attack complex of human  
64 complement. *J Biol Chem* 266:13418–13422.
- 65 23. Ventura-Juárez J, Campos-Rodríguez R, Jarillo-Luna RA, Muñoz-Fernández L, Escario-G-Trevijano JA, Pérez-  
66 Serrano J, Quintanar JL, Salinas E, Villalobos-Gómez FR. 2009. Trophozoites of *Entamoeba histolytica*  
67 express a CD59-like molecule in human colon. *Parasitol Res* 104:821–826.
- 68 24. Goslings WR, Blom DJ, de Waard-Siebinga I, van Beelen E, Claas FH, Jager MJ, Gorter A. 1996. Membrane-  
69 bound regulators of complement activation in uveal melanomas. CD46, CD55, and CD59 in uveal  
70 melanomas. *Invest Ophthalmol Vis Sci* 37:1884–1891.
- 71 25. Varsano S, Rashkovsky L, Shapiro H, Ophir D, Mark-Bentankur T. 1998. Human lung cancer cell lines  
72 express cell membrane complement inhibitory proteins and are extremely resistant to complement-  
73 mediated lysis; a comparison with normal human respiratory epithelium in vitro, and an insight into  
74 mechanism(s) of resistance. *Clin Exp Immunol* 113:173–182.
- 75 26. Nicholson-Weller A, Burge J, Fearon DT, Weller PF, Austen KF. 1982. Isolation of a human erythrocyte  
76 membrane glycoprotein with decay-accelerating activity for C3 convertases of the complement system.  
77 *The Journal of Immunology* 129:184–189.

- 38 27. Medof ME, Kinoshita T, Nussenzweig V. 1984. Inhibition of complement activation on the surface of cells  
39 after incorporation of decay-accelerating factor (DAF) into their membranes. *J Exp Med* 160:1558–1578.
- 30 28. Wang G, Liszewski MK, Chan AC, Atkinson JP. 2000. Membrane Cofactor Protein (MCP; CD46): Isoform-  
31 Specific Tyrosine Phosphorylation. *The Journal of Immunology* 164:1839–1846.
- 32 29. Riley-Vargas RC, Gill DB, Kemper C, Liszewski MK, Atkinson JP. 2004. CD46: expanding beyond complement  
33 regulation. *Trends in Immunology* 25:496–503.
- 34 30. Liszewski MK, Atkinson JP. 2015. Complement regulator CD46: genetic variants and disease associations.  
35 *Human Genomics* 9:7.
- 36 31. Seya T, Turner JR, Atkinson JP. 1986. Purification and characterization of a membrane protein (gp45-70)  
37 that is a cofactor for cleavage of C3b and C4b. *J Exp Med* 163:837–855.
- 38 32. Fishelson Z, Donin N, Zell S, Schultz S, Kirschfink M. 2003. Obstacles to cancer immunotherapy: expression  
39 of membrane complement regulatory proteins (mCRPs) in tumors. *Molecular Immunology* 40:109–123.
- 30 33. Gelderman KA, Blok VT, Fleuren GJ, Gorter A. 2002. The Inhibitory Effect of CD46, CD55, and CD59 on  
31 Complement Activation After Immunotherapeutic Treatment of Cervical Carcinoma Cells with Monoclonal  
32 Antibodies or Bispecific Monoclonal Antibodies. *Lab Invest* 82:483–493.
- 33 34. Jurianz K, Maslak S, Garcia-Schüler H, Fishelson Z, Kirschfink M. 1999. Neutralization of complement  
34 regulatory proteins augments lysis of breast carcinoma cells targeted with rhumAb anti-HER2.  
35 *Immunopharmacology* 42:209–218.
- 36 35. Cong L, Ran FA, Cox D, Lin S, Barretto R, Habib N, Hsu PD, Wu X, Jiang W, Marraffini LA, Zhang F. 2013.  
37 Multiplex genome engineering using CRISPR/Cas systems. *Science* 339:819–823.



08 36. Thielen AJF, van Baarsen IM, Jongasma ML, Zeerleder S, Spaapen RM, Wouters D. 2018. CRISPR/Cas9  
09 generated human CD46, CD55 and CD59 knockout cell lines as a tool for complement research. *Journal of*  
10 *Immunological Methods* 456:15–22.

11 37. Schindelin J, Arganda-Carreras I, Frise E, Kaynig V, Longair M, Pietzsch T, Preibisch S, Rueden C, Saalfeld S,  
12 Schmid B, Tinevez J-Y, White DJ, Hartenstein V, Eliceiri K, Tomancak P, Cardona A. 2012. Fiji: an open-  
13 source platform for biological-image analysis. *Nat Methods* 9:676–682.

14

## FIGURE LEGENDS

### **Fig 1: Amoebic protection from complement following trogocytosis is dose-dependent.**

Amoebae were labeled with CMFDA cytoplasm dye and incubated alone or with increasing concentrations of human Jurkat cells or primary human red blood cells. Human cells were labeled with DiD membrane dye. Following exposure to human serum, amoeba death was assessed with Zombie Violet viability dye and ingested human cell material was determined by quantifying mean fluorescence intensity (MFI) of DiD present on amoebae. **(A)** Normalized MFI of DiD on amoebae incubated alone or with increasing concentrations of Jurkat cells. **(B)** Normalized death of amoebae from conditions in panel A. **(C)** Death of amoebae from conditions in panel A, expressed as percent protection. Percent protection was calculated by subtracting the total death of amoebae incubated with human cells from the total death of amoebae incubated alone. **(D)** Normalized MFI of DiD on amoebae incubated alone or with increasing concentrations of red blood cells. **(E)** Normalized death of amoebae from conditions in panel D. **(F)** Death of amoebae from conditions in panel D, expressed as percent protection. **(G)** Representative images of amoebae incubated with increasing concentrations of Jurkat cells. Amoebae are shown in green and ingested human cell material is shown in red. Data were analyzed by imaging flow cytometry and are from 6 replicates across 3 independent experiments. **(H)** Representative images of amoebae incubated with red blood cells. Data were analyzed by imaging flow cytometry and are from 6 replicates across 3 independent experiments.

### **Fig 2: Amoebic trogocytosis of human cells inhibits deposition of complement C3b.**

Amoebae were incubated alone or in the presence of human Jurkat T cells and subsequently exposed to human serum. Viability was assessed with Zombie Violet dye. The presence of C3b was detected using a mouse monoclonal antibody to C3b and iC3b. **(A)** Death of amoebae that were incubated alone (open bar) or in the presence of human Jurkat T cells (filled bar). **(B)** Mean fluorescence intensity of deposited C3b on amoebae. **(C)** Deposited C3b on dead (open bar) or live (filled bar) amoebae. **(D)** Deposited C3b on dead or live amoebae that had been incubated alone (open circles) or in the presence of human Jurkat T cells (closed

39 circles). **(E)** Representative images of C3b deposition (red) on live or dead amoebae. Data were analyzed by  
40 imaging flow cytometry and are from 6 replicates across 3 independent experiments.

41 **Fig 3: Amoebae acquire and display the complement regulatory protein CD59 from human cells.**

42 Amoebae were allowed to perform trogocytosis on human Jurkat T cells for 5 minutes or 1 hour, or were  
43 incubated alone. Human CD59 (red) was detected on the amoebae surface by monoclonal antibody staining.  
44 Amoebae were labeled with CMFDA (green) and human cell nuclei were labeled with Hoechst (blue). **(A)**  
45 Representative images from amoebae incubated alone or amoebae that performed trogocytosis on human  
46 Jurkat T cells for 5 minutes or 1 hour. Arrows indicate patches of displayed CD59 on the amoeba surface. **(B)**  
47 3D rendering of Z stack images taken from amoebae that were incubated with human Jurkat T cells for 1 hour.  
48 **(C)** Zoomed in image of amoebae that were incubated with human Jurkat T cells for 1 hour. Data were  
49 analyzed by confocal microscopy. 136 Images were collected from 1 independent experiment.

50 **Fig. 4: The amount of displayed CD59 increases with increased trogocytosis of human cells.**

51 Acquired CD59 molecules were quantified on amoebae that were allowed to perform trogocytosis on human  
52 Jurkat T cells for 5 minutes or 1 hour, or were incubated alone. **(A)** Masking strategy for analysis of displayed  
53 CD59 on the amoeba surface. A mask was created in order to allow for the detection of CD59 that overlapped  
54 with amoebae, while excluding CD59 on intact human cells attached to amoebae. The mask is displayed in  
55 turquoise, as an overlay on the individual images. Amoebae were labeled with CMFDA (green), human cell  
56 nuclei were labeled with Hoechst (blue), and CD59 was detected with a monoclonal antibody (red).  
57 Extracellular human cell nuclei fluorescence was removed from the masked analysis area. The excluded area  
58 around human cell nuclei was then dilated by 4 pixels to include the entire diameter of the intact extra-cellular  
59 human cells and associated CD59. CD59 was analyzed in the remaining masked analysis area of each image to  
60 allow for analysis of displayed patches of acquired CD59 on amoebae. **(B)** The normalized mean fluorescence  
61 intensity of CD59 on amoebae after 5 minutes or 1 hour of trogocytosis or amoebae that were incubated  
62 alone. To normalize the data, samples were normalized to the 1 hour of trogocytosis condition. **(C)**

53 Representative images of amoebae that had performed trogocytosis on human Jurkat T cells for 5 minutes or  
54 1 hour. Arrows indicate displayed CD59. Data were analyzed by imaging flow cytometry and are from 5  
55 replicates across 3 independent experiments. The no primary control condition was performed in 2 of 3  
56 independent experiments and data are from 3 replicates.

57 **Fig. 5: Removal of CD59 and CD46 is not sufficient to sensitize amoebae to complement lysis.**

58 **(A-D)** Human Jurkat T cells deficient in CD59 or CD46 were constructed using CRISPR/Cas9.

59 Immunofluorescence and imaging flow cytometry were used to quantify CD59 or CD46. **(A)** Representative  
70 images of CD59 antibody staining (red) in vector control human cells or CD59 mutants. **(B)** Intensity of CD59  
71 antibody staining in vector control human cells (gray) or CD59 mutants (black). 99.5% of CD59 mutants were in  
72 the CD59-negative gate (“-CD59”), while 0.75% of vector control cells were in this gate. **(C)** Representative  
73 images of CD46 antibody staining (red) in vector control human cells or CD46 mutants. **(D)** Intensity of CD46  
74 antibody staining in vector control human cells (gray) or CD46 mutants (black). 99.5% of CD46 mutants were in  
75 the CD46-negative gate (“-CD46”), while 0.27% of vector control cells were in this gate. **(E-F)** Amoebae were  
76 labeled with CMFDA cytoplasm dye and incubated alone or with human Jurkat T cells. Human cell lines were  
77 either vector control cells (VC), CD59 mutants (-CD59), or CD46 mutants (-CD46). Human cells were labeled  
78 with DiD membrane dye. Following exposure to human serum, amoeba death was assessed with Zombie  
79 Violet viability dye and ingested human cell material was determined by quantifying mean fluorescence  
30 intensity (MFI) of DiD present on amoebae. **(E)** Normalized death of amoebae. **(F)** Normalized mean  
31 fluorescence intensity of DiD on amoebae. Data were analyzed by imaging flow cytometry and are from 6  
32 replicates across 3 independent experiments.

33 **TABLES**

34 **Table 1: Primers used in these studies.**

| Purpose                                                                          | Primer Name                                                                                                                                          | F/R                                      | Sequence                                                                                                                                      |
|----------------------------------------------------------------------------------|------------------------------------------------------------------------------------------------------------------------------------------------------|------------------------------------------|-----------------------------------------------------------------------------------------------------------------------------------------------|
| Cloning of guide RNAs into the pX330-U6-Chimeric_BB-CBh-hSpCas9 plasmid backbone | CD59 gRNA ( <b>BbsI overhang</b> )<br>CD59 gRNA ( <b>BbsI overhang</b> )<br>CD46 gRNA ( <b>BbsI overhang</b> )<br>CD46 gRNA ( <b>BbsI overhang</b> ) | Forward<br>Reverse<br>Forward<br>Reverse | <b>CACCGCAAGGAGGGTCTGTCCTGTT</b><br><b>AAACAACAGGACAGACCCTCCTTGC</b><br><b>CACCGAAAGGGGACACTCGCGGCGGC</b><br><b>AAACGCCGCCGCGAGTGTCCCTTTC</b> |
| Sanger sequencing of CRISPR gRNA plasmids                                        | GENEWIZ Universal Primer "U6"                                                                                                                        | Forward                                  | GACTATCATATGCTTACCGT                                                                                                                          |
| BLAST-identified primer sets for specific PCR amplification of CD59 and CD46     | CD59 PCR amplification<br>CD59 PCR amplification<br>CD46 PCR amplification<br>CD46 PCR amplification                                                 | Forward<br>Reverse<br>Forward<br>Reverse | TTGACTCACTGACCCTGATGG<br>TATCCATTGGTGTCCCAAGC<br>ACAAATATGACGGCGAGCCA<br>GGCTCAATCCCGAAAACACG                                                 |
| Sanger Sequencing of PCR product from CRIPSR knockout clones                     | CD59 sequencing<br>CD46 sequencing                                                                                                                   | Forward<br>Forward                       | GGGGCTTATAGGGACTGAGC<br>ACCTCTCGAAGGCCAAGG                                                                                                    |

35

36 **SUPPLEMENTAL MATERIAL**

37 **SUPPLEMENTAL FIGURE LEGENDS**

38 **Fig. S1: Removal of GPI-anchored surface proteins using phosphatidylinositol-specific phospholipase C.**

39 Amoebae were labeled with CMFDA cytoplasm dye and incubated alone or with human Jurkat T cells. Human  
40 cells were labeled with DiD membrane dye. Samples were then treated with phosphatidylinositol-specific  
41 phospholipase C (PI-PLC) to remove GPI-anchored proteins, or heat-inactivated phosphatidylinositol-specific  
42 phospholipase C (HI-PI-PLC) as a control. Following exposure to human serum, amoeba death was assessed  
43 with Zombie Violet viability dye and ingested human cell material was determined by quantifying mean  
44 fluorescence intensity (MFI) of DiD present on amoebae. **(A)** Normalized death of amoebae. **(B)** Normalized  
45 mean fluorescence intensity of DiD on amoebae. Data were analyzed by imaging flow cytometry and are from  
46 8 replicates across 4 independent experiments. The untreated control condition was performed 3 of 4  
47 independent experiments and data are from 6 replicates.

48 **Fig. S2: Sequencing analysis of Jurkat CRISPR/Cas9 mutants.**

49 Chromatograms from Sanger sequencing analysis of Jurkat T cell CRISPR/Cas9 mutants. Chromatograms from  
50 CD59 mutants **(A)** and CD46 mutants **(B)** show that the gene sequence of the mutants is different from the  
51 vector control cells downstream of the gRNA/PAM sites.

52 **Fig. S3: Gating strategy used for analysis of experiments with increasing numbers of human cells.**

53 **(A)** Gating strategy for experiments with increasing numbers of Jurkat cells. Focused cells were gated on from  
54 total collected events, using Gradient RMS Bright Field. Single amoebae were gated using area and aspect  
55 ratio of CMFDA cytoplasm dye fluorescence. Dead amoebae were gated on using fluorescence intensity of  
56 Zombie Violet dye and side scatter. **(B)** Gating strategy for experiments with increasing numbers of red blood  
57 cells. Only amoeba events were collected for analysis and were gated on using bright field area and aspect  
58 ratio during data acquisition. Focused cells were gated on from total collected events, using Gradient RMS

09 Bright Field. Single amoebae were gated using area and aspect ratio of CMFDA cytoplasm dye fluorescence.

L0 Dead amoebae were gated on using fluorescence intensity of Zombie Violet dye and side scatter.

L1 **Fig. S4: Gating strategy used for analysis of C3b deposition experiments.**

L2 **(A)** Focused cells were gated on from total collected events, using Gradient RMS Bright Field. Single amoebae  
L3 were gated using area and aspect ratio of CMFDA cytoplasm dye fluorescence. Dead amoebae were gated on  
L4 using fluorescence intensity of Zombie Violet dye and side scatter. **(B)** Representative histograms of C3b  
L5 fluorescence intensity of all single amoeba, live amoeba, or dead amoeba populations.

L6 **Fig. S5: Gating strategy used for analysis of CD59 displayed on amoebae after 5 minutes and 1 hour of**

L7 **trogocytosis.**

L8 A masking strategy was developed to quantify only fluorescence of CD59 present on the amoebae, and not on  
L9 extracellular human cells. **(A)** Focused cells were gated on from total collected events, using Gradient RMS  
L0 Bright Field. Single amoebae were gated using area and aspect ratio of CMFDA cytoplasm dye fluorescence.  
L1 Next, fluorescence intensity of CD59 inside of the masked area was measured. **(B)** Representative images of  
L2 bright field, amoeba cytoplasm, human cell nuclei, and CD59 fluorescence with the masked area (turquoise)  
L3 applied as an overlay.

L4 **Fig. S6: Gating strategy used for analysis of experiments with CRISPR knockout mutants and PI-PLC**

L5 **treatment.**

L6 Only cell events were collected for analysis (to minimize collection of debris) and were gated on using bright  
L7 field area and aspect ratio during data acquisition. Focused cells were gated on from total collected events,  
L8 using Gradient RMS Bright Field. Single amoebae were gated using area and aspect ratio of CMFDA cytoplasm  
L9 dye fluorescence. Amoebae were gated on a second time using CMFDA fluorescence intensity and side scatter  
L0 to eliminate remaining clumps of human cells from the analysis. Finally, dead amoebae were gated on using  
L1 fluorescence intensity of Zombie Violet dye and side scatter.

**Fig. 1** bioRxiv preprint doi: <https://doi.org/10.1101/2021.08.04.455151>; this version posted August 5, 2021. The copyright holder for this preprint (which was not certified by peer review) is the author/funder. All rights reserved. No reuse allowed without permission.

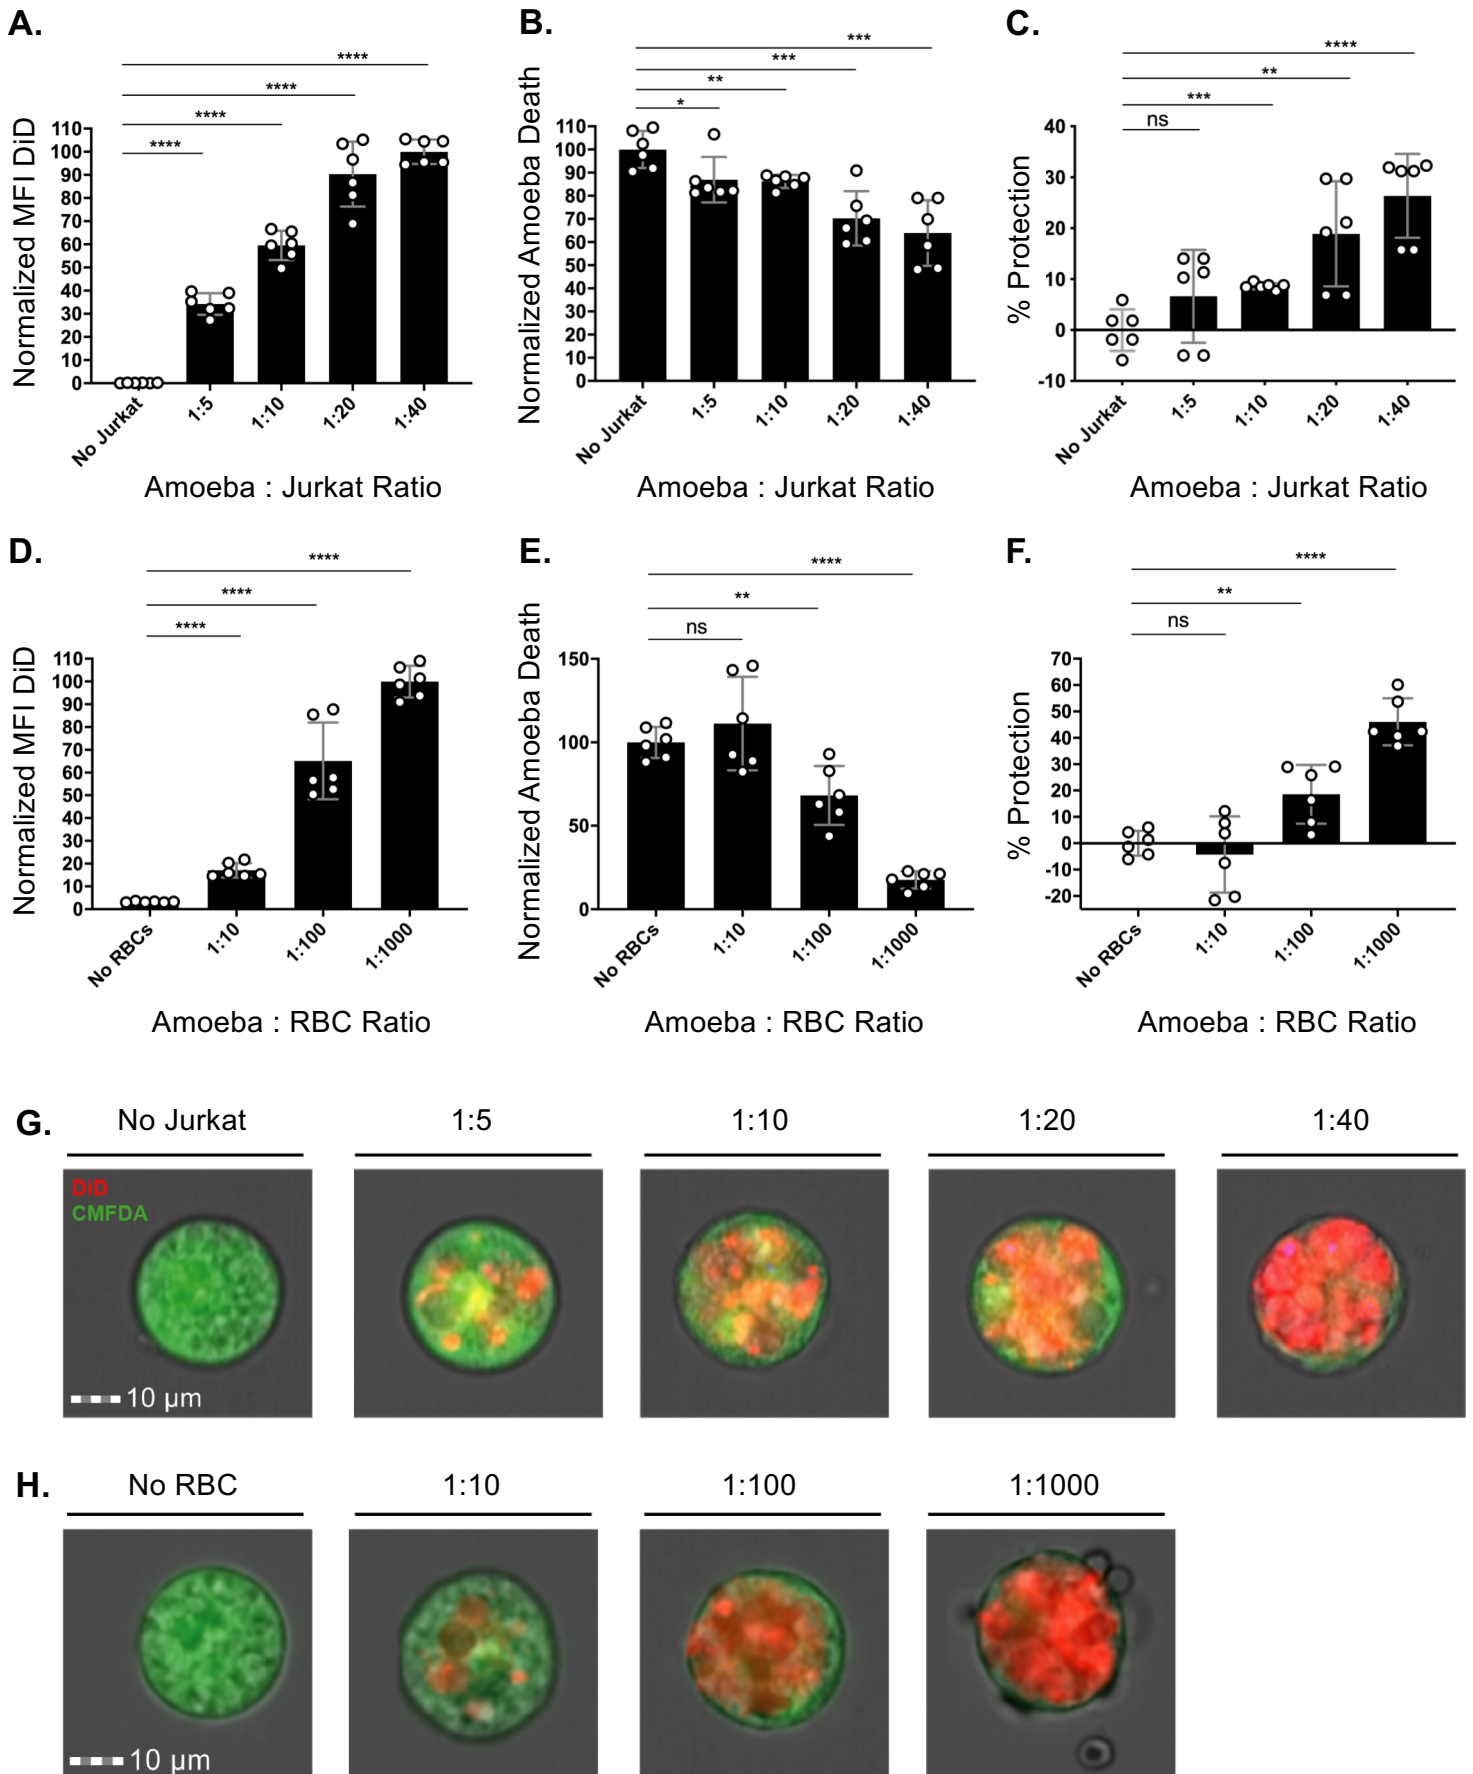



**Fig. 2** bioRxiv preprint doi: <https://doi.org/10.1101/2021.08.04.455151>; this version posted August 5, 2021. The copyright holder for this preprint (which was not certified by peer review) is the author/funder. All rights reserved. No reuse allowed without permission.

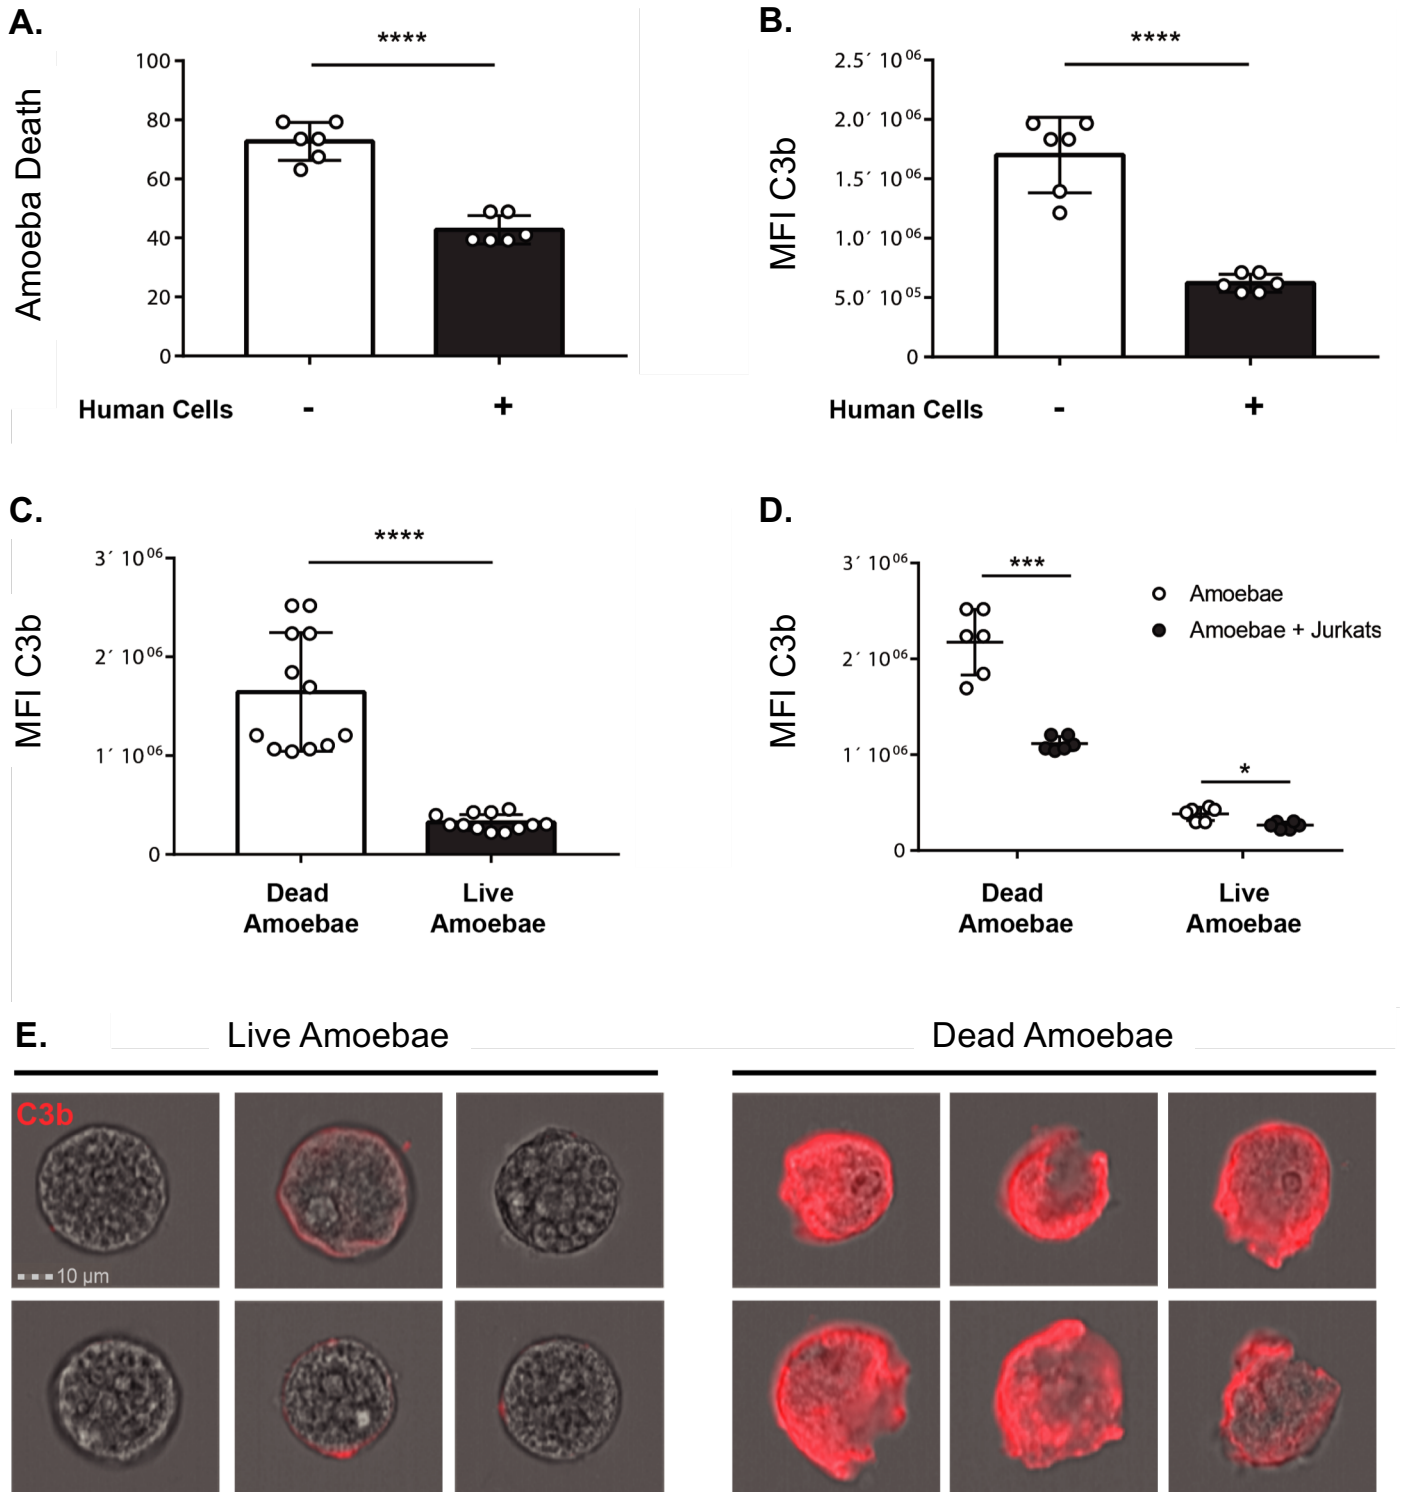

**Fig. 3** bioRxiv preprint doi: <https://doi.org/10.1101/2021.08.04.455151>; this version posted August 5, 2021. The copyright holder for this preprint (which was not certified by peer review) is the author/funder. All rights reserved. No reuse allowed without permission.

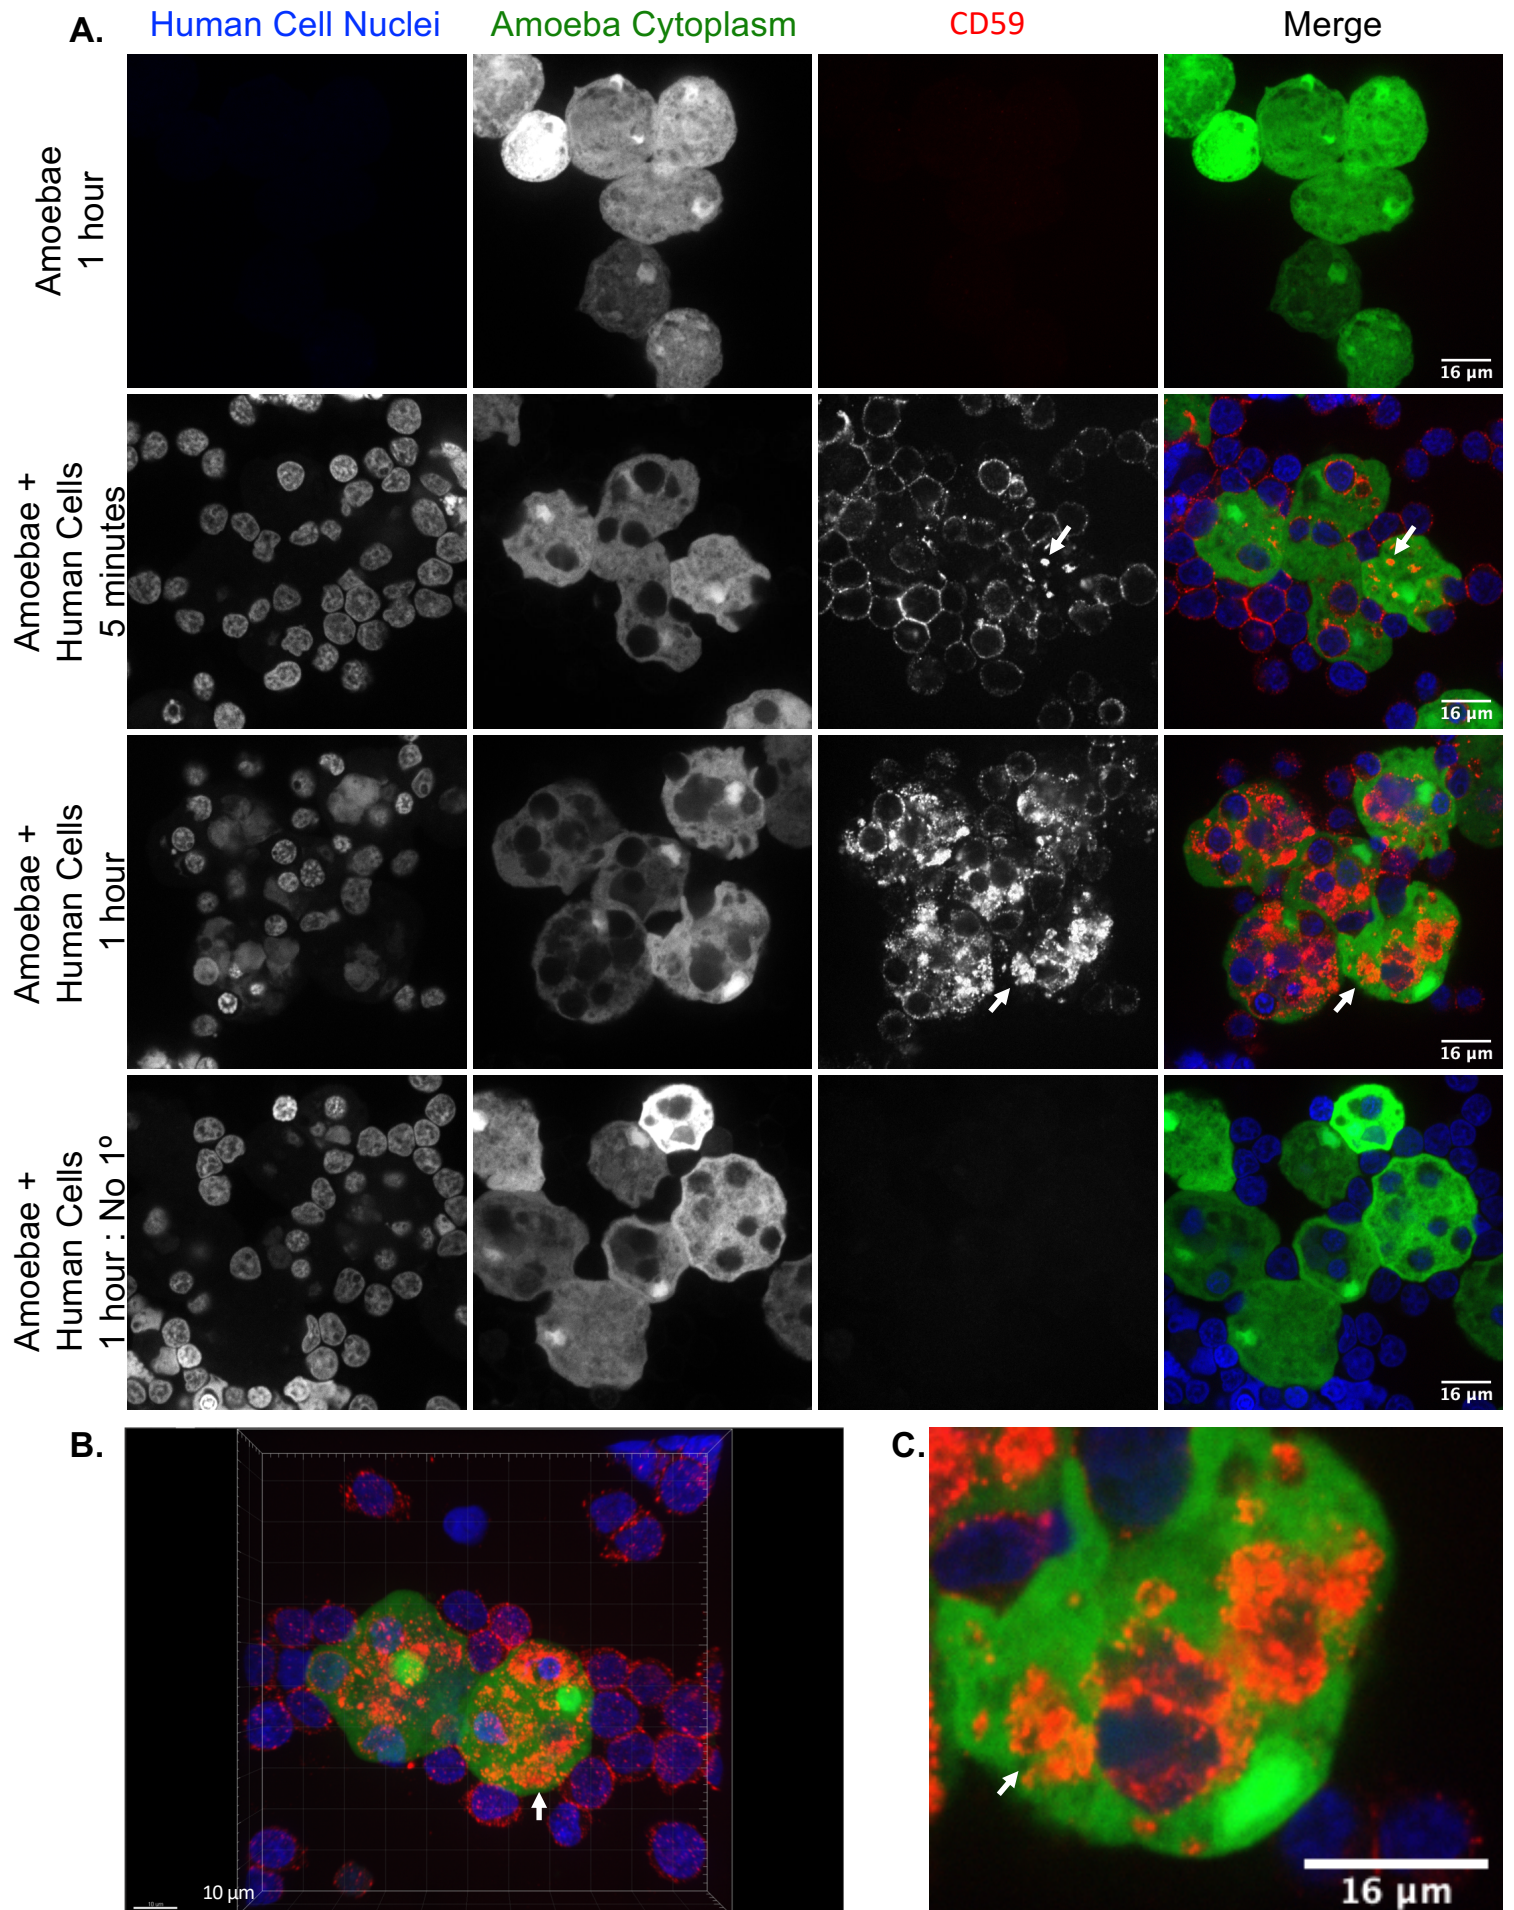

**Fig. 4** bioRxiv preprint doi: <https://doi.org/10.1101/2021.08.04.455151>; this version posted August 5, 2021. The copyright holder for this preprint (which was not certified by peer review) is the author/funder. All rights reserved. No reuse allowed without permission.

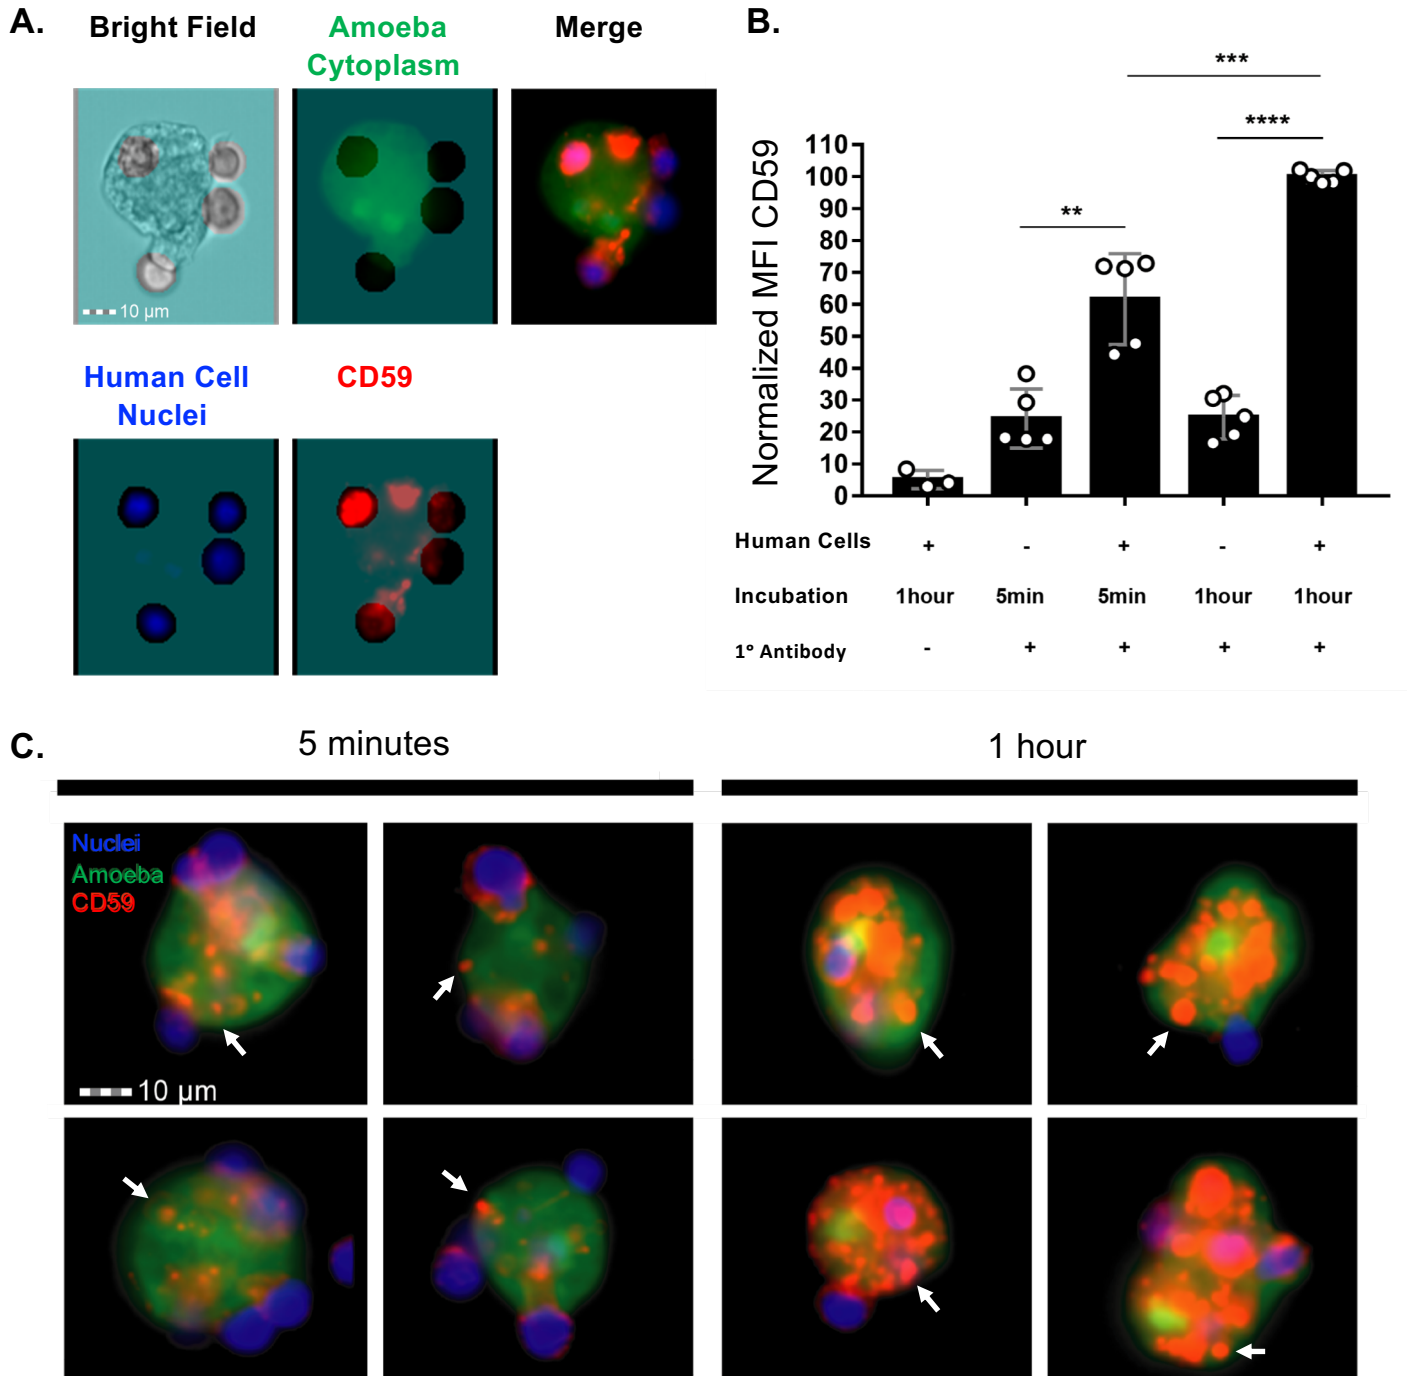



**Fig. 5** bioRxiv preprint doi: <https://doi.org/10.1101/2021.08.04.455151>; this version posted August 5, 2021. The copyright holder for this preprint (which was not certified by peer review) is the author/funder. All rights reserved. No reuse allowed without permission.

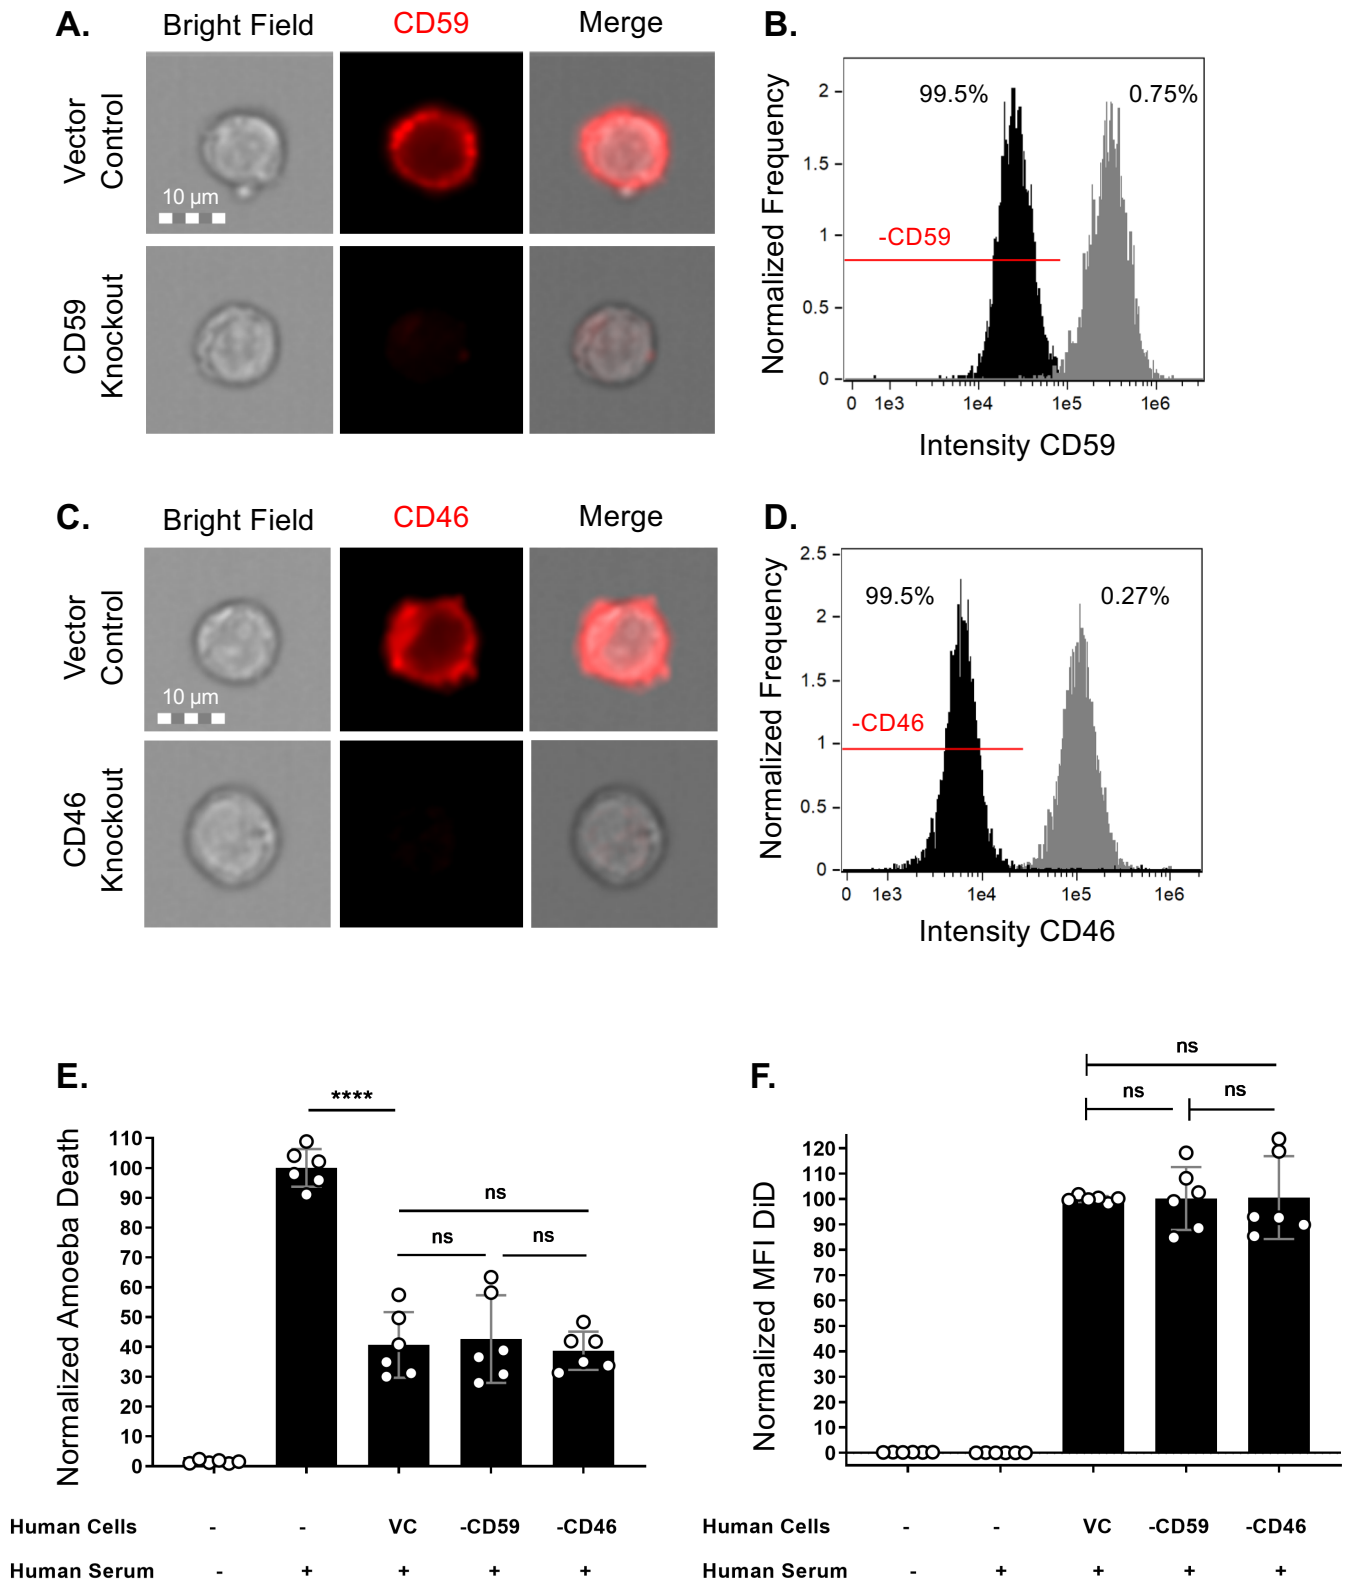

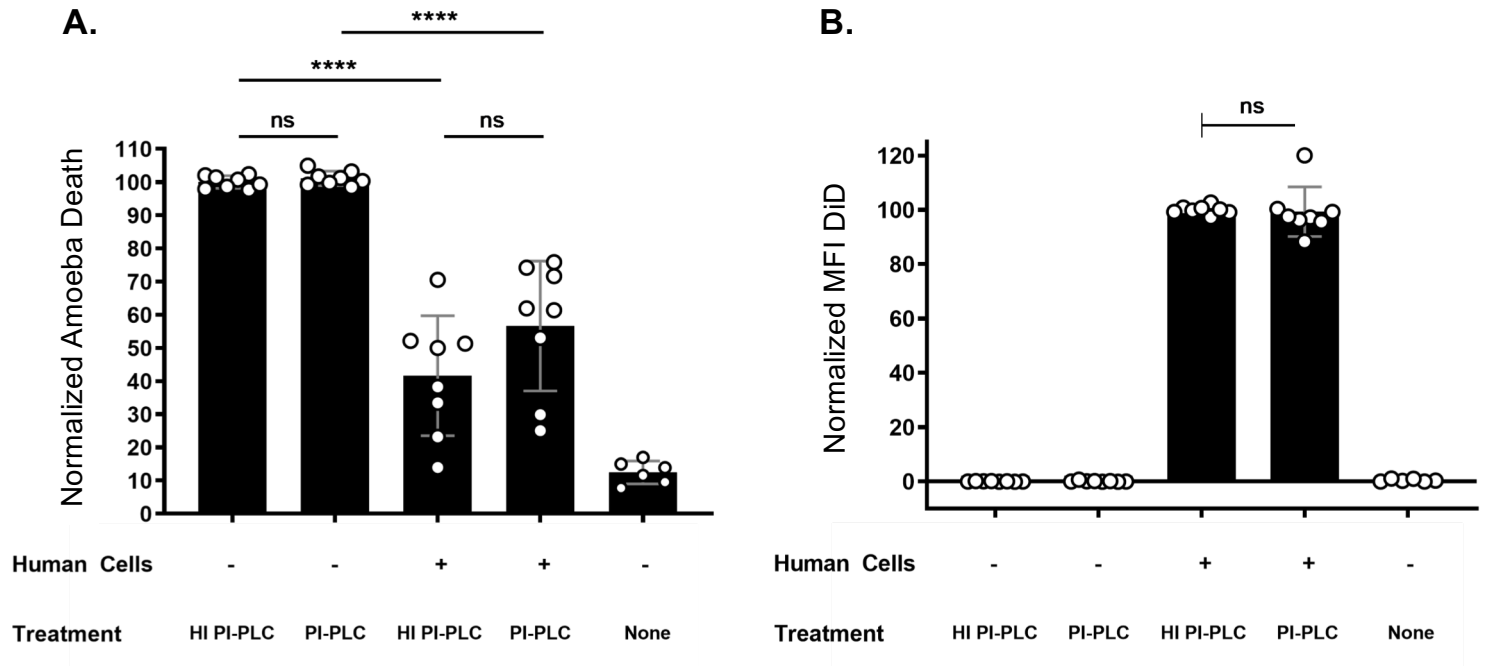

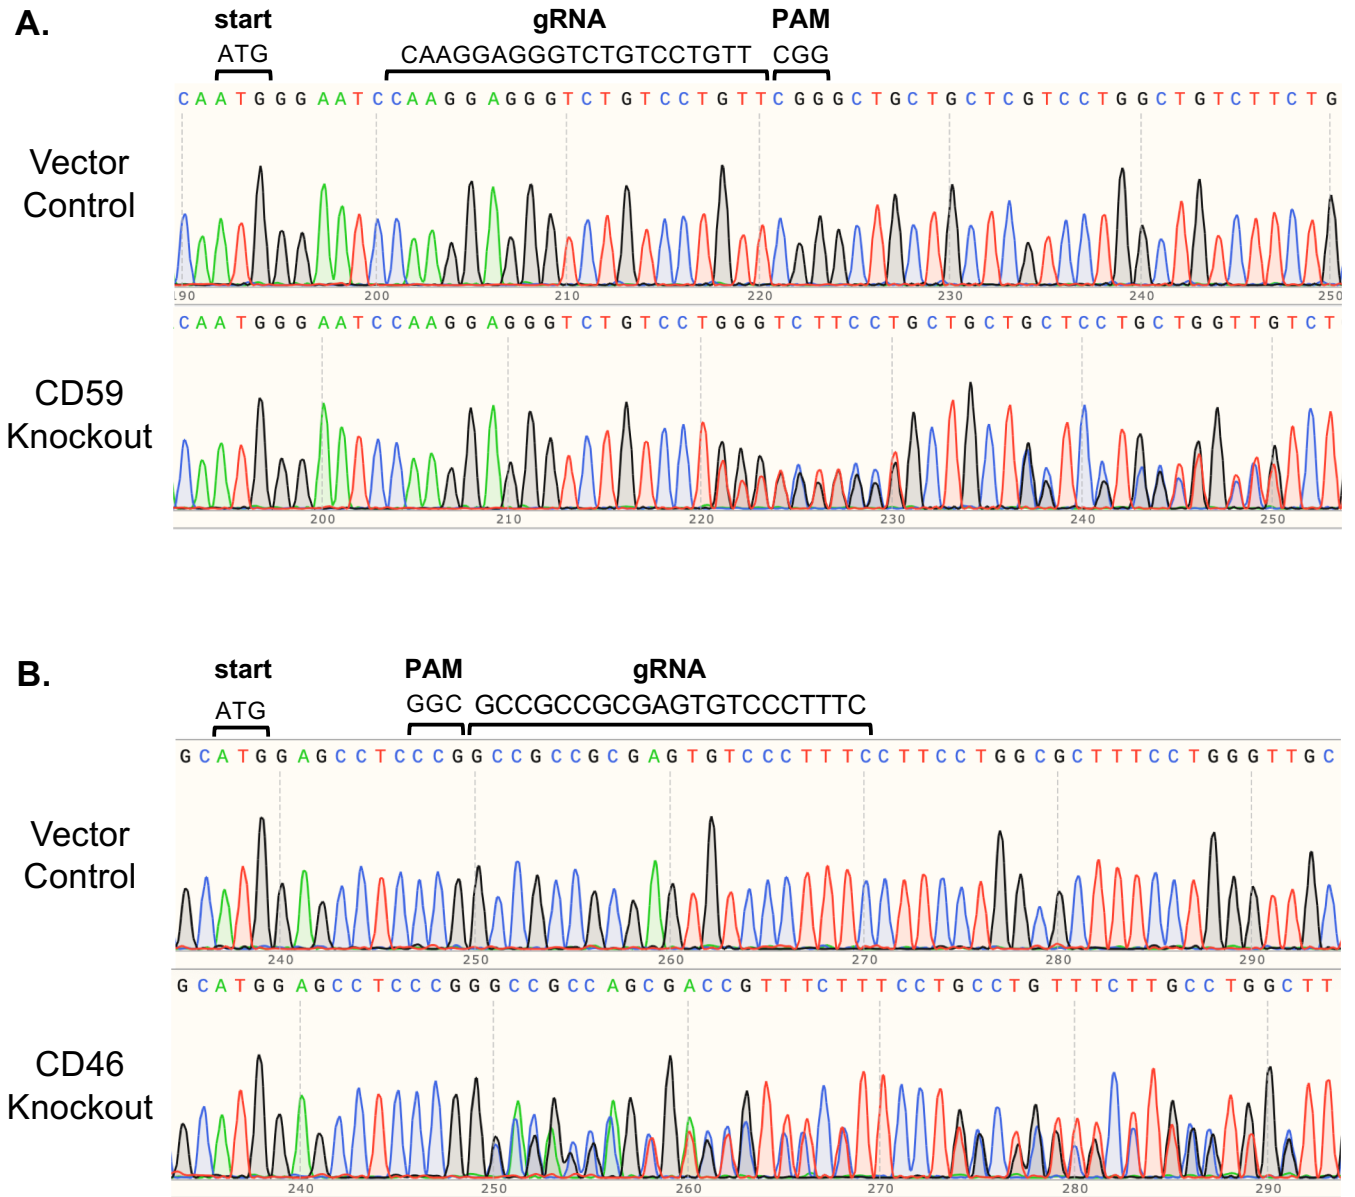

**Fig. S3** bioRxiv preprint doi: <https://doi.org/10.1101/2021.08.04.455151>; this version posted August 5, 2021. The copyright holder for this preprint (which was not certified by peer review) is the author/funder. All rights reserved. No reuse allowed without permission.

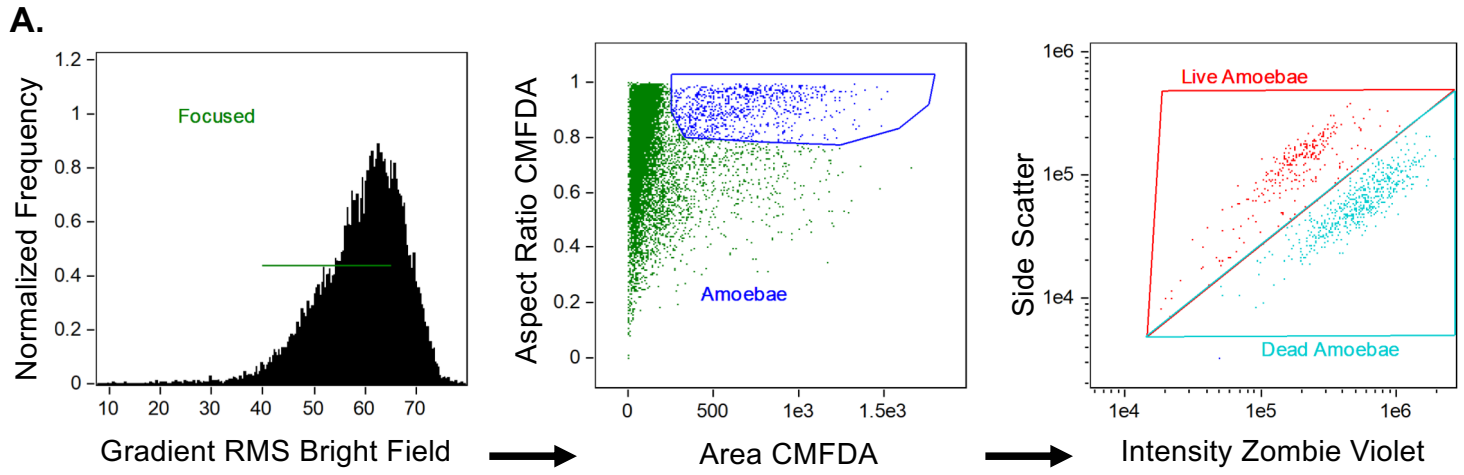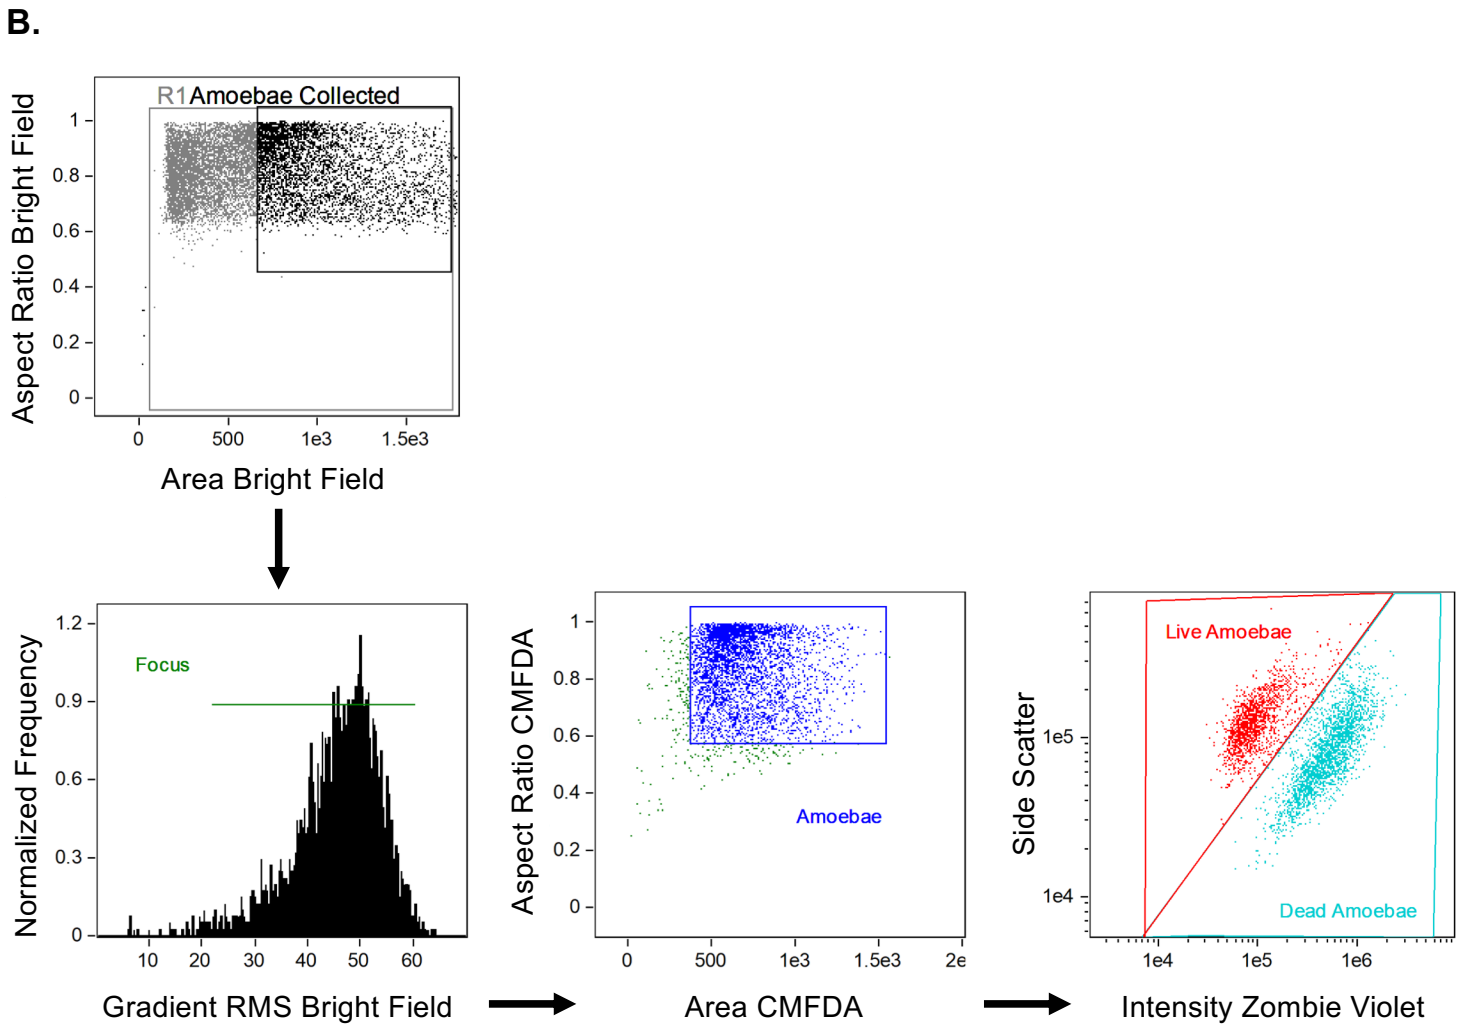

**Fig. S4**

bioRxiv preprint doi: <https://doi.org/10.1101/2021.08.04.455151>; this version posted August 5, 2021. The copyright holder for this preprint (which was not certified by peer review) is the author/funder. All rights reserved. No reuse allowed without permission.

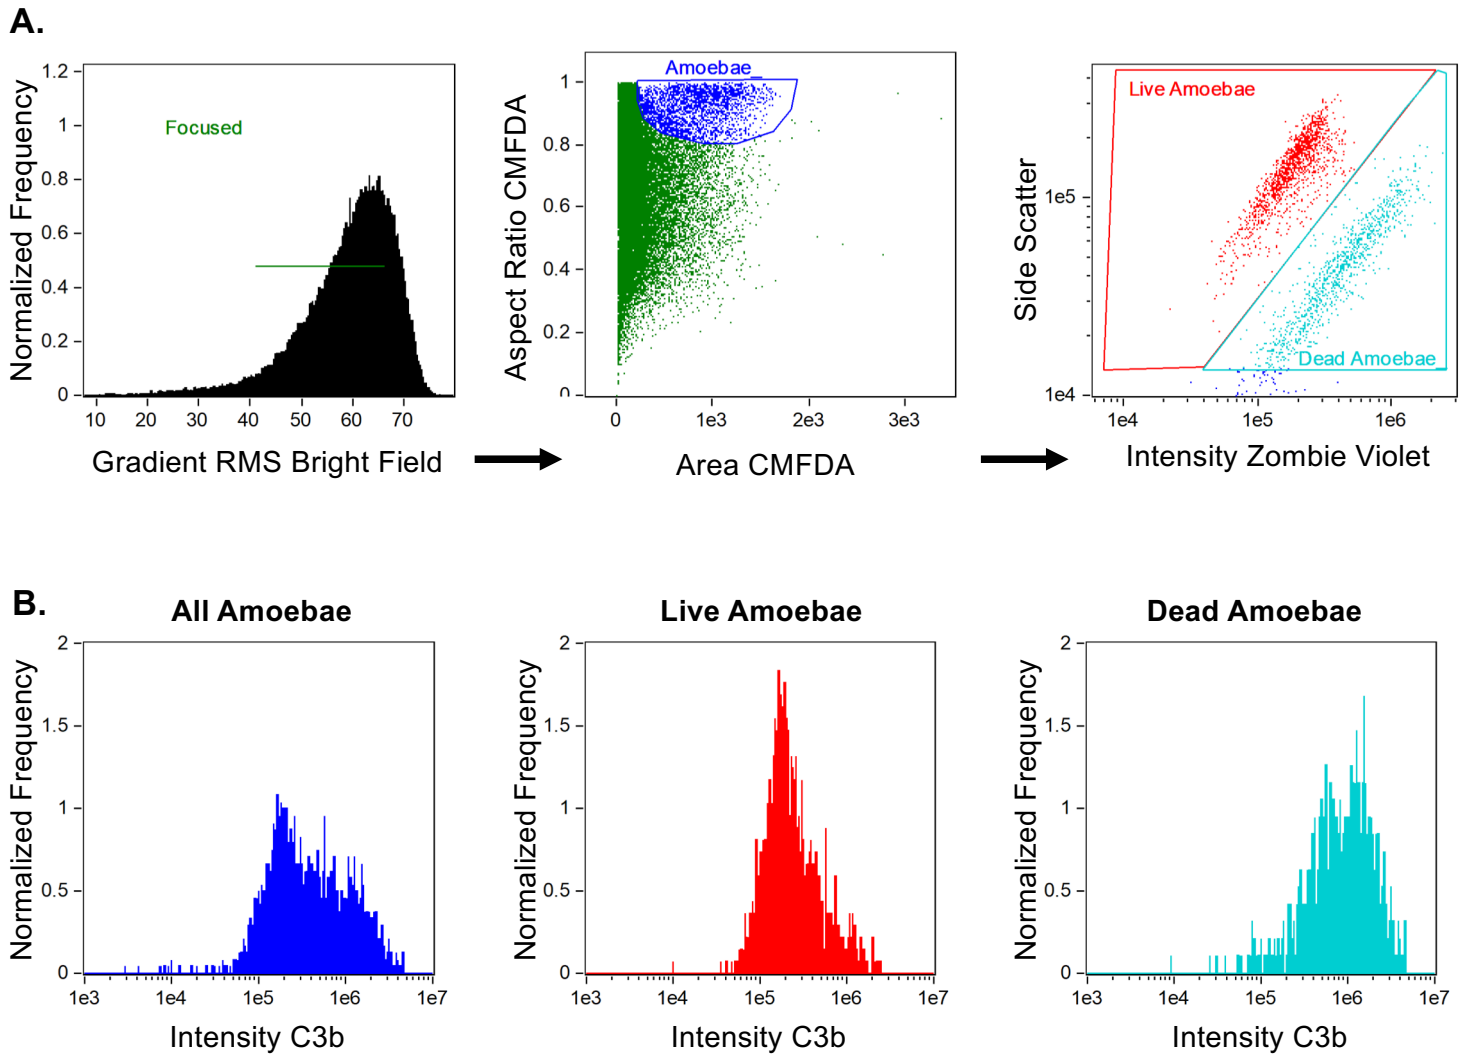





**Fig. S6**

bioRxiv preprint doi: <https://doi.org/10.1101/2021.08.04.455151>; this version posted August 5, 2021. The copyright holder for this preprint (which was not certified by peer review) is the author/funder. All rights reserved. No reuse allowed without permission.

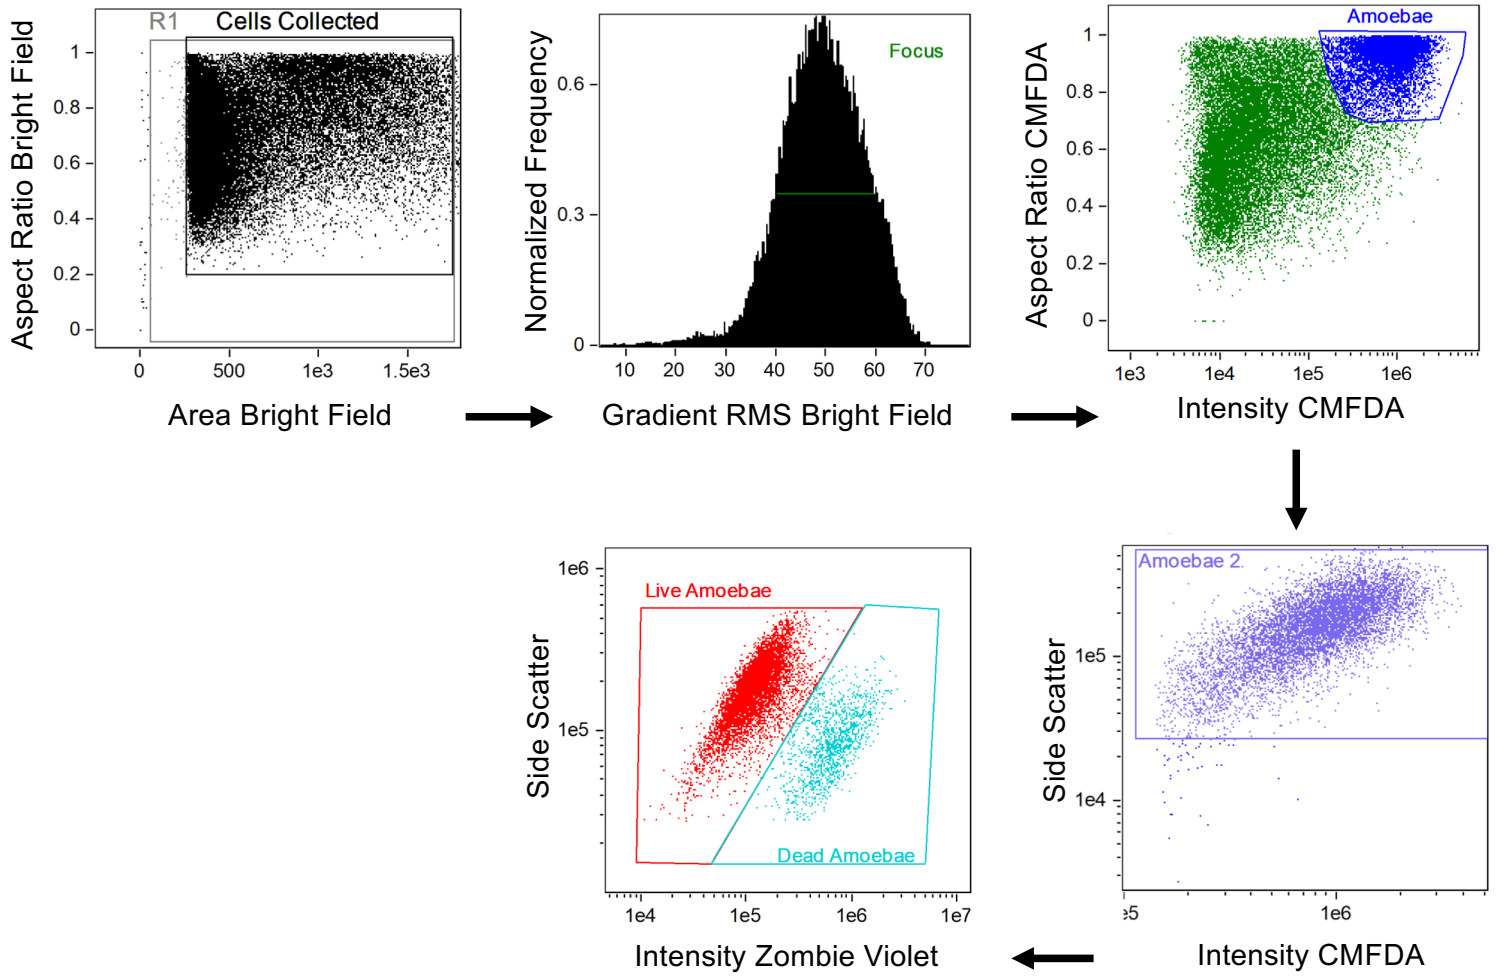

Source: https://www.biorxiv.org/content/10.1101/2021.08.04.455151v1.full.pdf
